# Supplementary material for: Hemicellulose pyrolysis: mechanism and kinetics of functionalized xylopyranose
Source: Royal Society of Chemistry journal article supplement (doi:10.1039/d3cp06094b), 2024-01-01
Supplement: d3cp06094b1.pdf [file d3cp06094b1.pdf]

## Electronic Supplementary Information

# Hemicellulose Pyrolysis: Mechanism and Kinetics of Functionalized Xylopyranose

Leandro Ayarde-Henríquez,<sup>\*ab</sup> Jacopo Lupi,<sup>ab</sup> and Stephen Dooley<sup>\*ab</sup>

<sup>a</sup>School of Physics, Trinity College Dublin, Dublin 2, Ireland.

<sup>b</sup>AMBER, Advanced Materials and BioEngineering Research Centre, Dublin 2, Ireland.

Correspondence to: [leandro.ayarde@tcd.ie](mailto:leandro.ayarde@tcd.ie)  
[stephen.dooley@tcd.ie](mailto:stephen.dooley@tcd.ie)

## Contents

|                                                                                                                                                                                                                                    |     |
|------------------------------------------------------------------------------------------------------------------------------------------------------------------------------------------------------------------------------------|-----|
| 1. Optimized Cartesian coordinates for minima and TSs of $\beta$ -D-xylopyranose's initial reactions at the M06-2X/6-311++G(d,p) level .....                                                                                       | S1  |
| 2. Optimized Cartesian coordinates for minima and TSs of 2-O-acetyl- $\beta$ -D-xylopyranose's initial reactions at the M06-2X/6-311++G(d,p) level .....                                                                           | S13 |
| 3. Optimized Cartesian coordinates for minima and TSs of 4-methoxy-5-carboxy- $\beta$ -D-xylopyranose's initial reactions at the M06-2X/6-311++G(d,p) level .....                                                                  | S25 |
| <b>Table S1.</b> Heat capacity, $C_V$ , in kcal mol <sup>-1</sup> K <sup>-1</sup> at different temperatures of chemical species involved in the initial elementary reactions: ring opening, ring contraction, and elimination..... | S41 |
| <b>Table S2.</b> Entropy, $S$ , in kcal mol <sup>-1</sup> K <sup>-1</sup> at different temperatures of chemical species involved in the initial elementary reactions: ring opening, ring contraction, and elimination.....         | S42 |
| <b>Table S3.</b> $\mathcal{F}_1$ diagnostic. ....                                                                                                                                                                                  | S43 |

## 1. Optimized Cartesian coordinates for minima and TSs of $\beta$ -D-xylopyranose's initial reactions at the M06-2X/6-311++G(d,p) level

### Ring-opening ( $\beta$ -D-xylopyranose $\rightarrow$ D-xylose)

Reactant ( $\beta$ -D-xylopyranose)

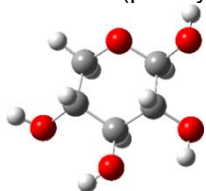

|   |             |             |             |
|---|-------------|-------------|-------------|
| C | -1.38469600 | -0.55335500 | -0.29388900 |
| C | -0.56258400 | -1.72802300 | 0.23068100  |
| C | 1.43885800  | -0.46884400 | 0.25359100  |
| C | 0.72491200  | 0.79435700  | -0.20863900 |
| C | -0.74134800 | 0.73030000  | 0.19135300  |
| H | -0.60475900 | -1.73503100 | 1.32941900  |

|   |             |             |             |
|---|-------------|-------------|-------------|
| H | -0.94859500 | -2.68003500 | -0.13626100 |
| H | -1.38478600 | -0.56048900 | -1.39048400 |
| H | 1.45194900  | -0.50082900 | 1.35597300  |
| H | 0.80216800  | 0.83627300  | -1.30345000 |
| H | -0.80332500 | 0.74664400  | 1.29030900  |
| O | 0.76789200  | -1.62214400 | -0.23076700 |
| O | 2.71462500  | -0.46820200 | -0.27402300 |
| H | 3.16164700  | -1.26936100 | 0.01422100  |
| O | 1.34772000  | 1.90356100  | 0.39097100  |
| H | 0.81365900  | 2.67634700  | 0.17899200  |
| O | -1.36628300 | 1.87925700  | -0.34293500 |
| H | -2.29784300 | 1.84353800  | -0.10300000 |
| O | -2.70969800 | -0.55411700 | 0.21411700  |
| H | -3.23855900 | -1.19964600 | -0.26052300 |

Product (D-xylose)

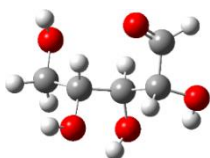

|   |             |             |             |
|---|-------------|-------------|-------------|
| C | 1.20797700  | 0.23390500  | -0.34072700 |
| C | 2.16531900  | 1.00036100  | 0.56916900  |
| C | -1.85741800 | 0.45722700  | -1.04054500 |
| C | -1.13937200 | -0.75412700 | -0.48107800 |
| C | 0.01792500  | -0.31375500 | 0.44187800  |
| H | 2.42895100  | 0.37868700  | 1.42627100  |
| H | 3.08555400  | 1.23292900  | 0.01838500  |
| H | 0.83763000  | 0.89550600  | -1.13185500 |
| H | -2.87131700 | 0.61517200  | -0.62640700 |
| H | -0.72126400 | -1.33416700 | -1.31556300 |
| H | -0.33842100 | 0.45085100  | 1.13737600  |
| O | 1.55863000  | 2.16798700  | 1.08315700  |
| O | -1.37435100 | 1.20665800  | -1.84677900 |
| H | 1.41172500  | 2.79011400  | 0.36547900  |
| O | -2.08602000 | -1.49795100 | 0.24266600  |
| H | -1.59912300 | -2.00492600 | 0.90373900  |
| O | 0.41133900  | -1.42108800 | 1.23174400  |
| H | 1.03020100  | -1.94184600 | 0.70258800  |
| O | 1.85034500  | -0.90666800 | -0.90156000 |
| H | 2.45895300  | -0.63878500 | -1.59321700 |

TS-DXP

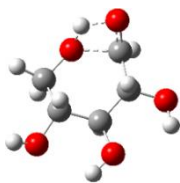

|   |            |             |            |
|---|------------|-------------|------------|
| C | 1.26257400 | -0.53164900 | 0.31987800 |
|---|------------|-------------|------------|

|   |             |             |             |
|---|-------------|-------------|-------------|
| C | 0.65851400  | -1.74916600 | -0.37227000 |
| C | -1.73006000 | -0.25874800 | -0.19854500 |
| C | -0.81193600 | 0.89259700  | 0.21160200  |
| C | 0.63027700  | 0.73184700  | -0.24707700 |
| H | 1.03808700  | -1.78624100 | -1.39664400 |
| H | 0.92870100  | -2.67937000 | 0.13329100  |
| H | 1.09059900  | -0.55898900 | 1.40330700  |
| H | -2.14701100 | -0.12944200 | -1.20407100 |
| H | -0.82544000 | 0.94458200  | 1.30750700  |
| H | 0.66057200  | 0.68403400  | -1.34640400 |
| O | -0.75983600 | -1.66127000 | -0.41683300 |
| O | -2.42670000 | -0.86946600 | 0.70876800  |
| H | -1.52902000 | -1.77869000 | 0.45303600  |
| O | -1.37500000 | 2.05309500  | -0.35611300 |
| H | -0.77494000 | 2.78269800  | -0.16582300 |
| O | 1.30200900  | 1.88644500  | 0.20843500  |
| H | 2.24458100  | 1.75331600  | 0.05922200  |
| O | 2.65129000  | -0.44699200 | 0.03817600  |
| H | 3.14382200  | -1.01763200 | 0.63238400  |

Ring contraction ( $\beta$ -D-xylopyranose  $\rightarrow$  FF1 + H<sub>2</sub>O)

Product (FF1)

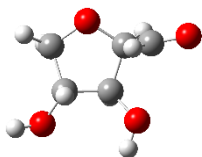

|   |             |             |             |
|---|-------------|-------------|-------------|
| C | 1.22930900  | 1.44415600  | -0.02052700 |
| C | 1.36417100  | -0.02805000 | -0.38962800 |
| C | 0.28792200  | -0.64704800 | 0.49326400  |
| C | -0.80147400 | 0.44373600  | 0.51689800  |
| C | -1.93076700 | 0.11611100  | -0.44967900 |
| H | 1.08707200  | -0.18461300 | -1.43974200 |
| H | 1.71865500  | 1.62996100  | 0.94402300  |
| H | -1.22682500 | 0.58511300  | 1.51293800  |
| H | -1.66182800 | 0.21741600  | -1.51978000 |
| H | 0.71521800  | -0.77757800 | 1.49480600  |
| O | -0.17479800 | 1.64245800  | 0.06528500  |
| O | -3.02910900 | -0.19921300 | -0.09682100 |
| O | -0.23950100 | -1.85735100 | 0.01008200  |
| H | 0.45083100  | -2.52562000 | 0.04993600  |
| O | 2.60338900  | -0.62903000 | -0.08789400 |
| H | 3.25292600  | -0.38702100 | -0.75213400 |
| H | 1.62255900  | 2.13621200  | -0.76520200 |

Product (H<sub>2</sub>O)

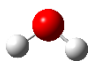

|   |            |             |            |
|---|------------|-------------|------------|
| H | 1.25440900 | -2.44994500 | 1.61081100 |
| O | 2.04838200 | -2.91340400 | 1.33735600 |
| H | 2.55921300 | -3.03028400 | 2.14067700 |

TS-FF1

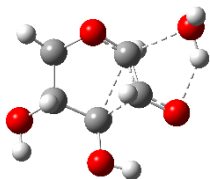

|   |             |             |             |
|---|-------------|-------------|-------------|
| C | -1.61434800 | -0.31073800 | -0.29949600 |
| C | -1.03417000 | -1.68035500 | 0.05314700  |
| C | 0.97770400  | -0.66631000 | 0.24546900  |
| C | 0.85382300  | 0.64933100  | -0.33187200 |
| C | -0.70028100 | 0.76892400  | 0.25687800  |
| H | -1.11354400 | -1.85685700 | 1.13111800  |
| H | -1.50164800 | -2.49400600 | -0.49317800 |
| H | -1.66379400 | -0.19850700 | -1.38940200 |
| H | 1.18476800  | -0.76797000 | 1.31274000  |
| H | 0.67641000  | 0.57547400  | -1.42420000 |
| H | -0.67570200 | 0.72026300  | 1.35390900  |
| O | 0.36649000  | -1.68087400 | -0.34904400 |
| O | 3.12627400  | -0.58646600 | 0.13852800  |
| O | 1.61685500  | 1.60899400  | 0.11804700  |
| H | 2.95426200  | 0.39236900  | 0.18945300  |
| O | -1.12408200 | 2.02665300  | -0.16356200 |
| H | -0.36857100 | 2.62059700  | -0.01692400 |
| O | -2.90064900 | -0.25567900 | 0.27409600  |
| H | -3.23003700 | 0.64304800  | 0.16655700  |
| H | 3.50736900  | -0.74896000 | -0.72944300 |

Ring contraction ( $\beta$ -D-xylopyranose  $\rightarrow$  FF2 + H<sub>2</sub>O)

Product (FF2)

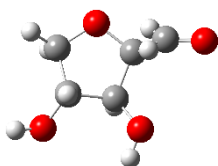

|   |             |             |             |
|---|-------------|-------------|-------------|
| C | -1.51972900 | -0.03512900 | -0.23308700 |
| C | -1.11301600 | -1.48369000 | 0.01431400  |
| C | 2.06258900  | -0.29449100 | 0.45442500  |
| C | 0.83314300  | -0.26591600 | -0.42949500 |
| C | -0.22973600 | 0.69037100  | 0.12378500  |
| H | -1.18426900 | -1.70412700 | 1.08623800  |
| H | -1.73003300 | 0.13916000  | -1.29494900 |
| H | 1.94927200  | -0.93128500 | 1.35721800  |
| H | 1.11262700  | 0.03869900  | -1.44197300 |
| H | -0.17633500 | 0.73570800  | 1.22251800  |
| O | 0.23773400  | -1.55946200 | -0.43312300 |
| O | 3.06617200  | 0.31792700  | 0.23089500  |
| O | -0.08325100 | 1.96211200  | -0.44248200 |

|   |             |             |             |
|---|-------------|-------------|-------------|
| H | -0.70423700 | 2.55712900  | -0.01234600 |
| O | -2.56082100 | 0.44834000  | 0.58599700  |
| H | -3.40931100 | 0.17167900  | 0.23252600  |
| H | -1.69749900 | -2.21601100 | -0.54351400 |

TS-FF2

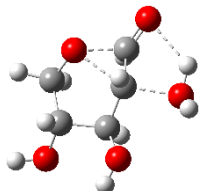

|   |             |             |             |
|---|-------------|-------------|-------------|
| C | 1.43570100  | -0.86706500 | 0.34936900  |
| C | 0.74943800  | 0.27158700  | -0.30880100 |
| C | -0.56580800 | 0.78208100  | 0.17776400  |
| C | -1.62050000 | -0.25196000 | -0.23104200 |
| C | -1.02522600 | -1.63107500 | 0.05219700  |
| O | 2.63323800  | -1.04949900 | 0.05710100  |
| O | 1.92770300  | 1.57823700  | 0.26490900  |
| O | -0.79971500 | 2.04782300  | -0.39835500 |
| O | -2.79432300 | 0.08203400  | 0.48363400  |
| O | 0.22841000  | -1.66253500 | -0.57022900 |
| H | 1.05590800  | -1.12618500 | 1.35427500  |
| H | 0.98854800  | 0.39234800  | -1.35889300 |
| H | -0.55486200 | 0.84827900  | 1.27332900  |
| H | -1.77652800 | -0.14805400 | -1.31215700 |
| H | -0.96035100 | -1.78464900 | 1.14064900  |
| H | 2.71487200  | 0.99832200  | 0.16522900  |
| H | 1.98713200  | 2.32548200  | -0.34194600 |
| H | -1.68670800 | 2.32185300  | -0.14178500 |
| H | -3.54494900 | -0.38190100 | 0.10494800  |
| H | -1.65323700 | -2.42433300 | -0.36539100 |

Elimination ( $\beta$ -D-xylopyranose  $\rightarrow$  AXP1 + H<sub>2</sub>O)

Product (AXP1)

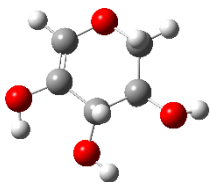

|   |             |             |             |
|---|-------------|-------------|-------------|
| C | 1.17875700  | -0.16563900 | -0.25723200 |
| C | 1.24443000  | 1.26935100  | 0.25098600  |
| C | -1.05324100 | 1.42974100  | -0.17099100 |
| C | -1.23064700 | 0.13965300  | 0.10580800  |
| C | -0.08032700 | -0.80883300 | 0.28815600  |
| H | 1.20370200  | 1.26805700  | 1.34816300  |
| H | 2.16287300  | 1.76156800  | -0.07077900 |
| H | 1.11651900  | -0.16825200 | -1.35204100 |
| H | -1.87898100 | 2.10789300  | -0.33463000 |

|   |             |             |             |
|---|-------------|-------------|-------------|
| H | 0.07089500  | -1.02836100 | 1.35456700  |
| O | 0.17178900  | 2.03610500  | -0.26715100 |
| O | -2.48163500 | -0.38791800 | 0.26045500  |
| H | -2.43952900 | -1.30441700 | -0.03910400 |
| O | -0.41569800 | -2.00641600 | -0.39613600 |
| H | 0.26903400  | -2.65610400 | -0.21141600 |
| O | 2.26971000  | -0.94557100 | 0.19959000  |
| H | 3.05544500  | -0.73144700 | -0.30925300 |

TS-AXP1

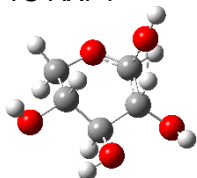

|   |             |             |             |
|---|-------------|-------------|-------------|
| C | 1.28593000  | -0.22360200 | 0.23288400  |
| C | 0.99053800  | -1.49768600 | -0.54989500 |
| C | -1.28923200 | -0.84573600 | -0.44768700 |
| C | -0.99048300 | 0.53243700  | -0.18450000 |
| C | 0.45841300  | 0.92072600  | -0.33045300 |
| H | 1.38623400  | -1.40775400 | -1.56396200 |
| H | 1.42440400  | -2.37351500 | -0.06988800 |
| H | 1.01781200  | -0.35156900 | 1.28588200  |
| H | -2.31226700 | -1.14393300 | -0.63919800 |
| H | -1.23183700 | 0.27096600  | 1.02915500  |
| H | 0.72636000  | 1.07913800  | -1.38625100 |
| O | -0.42033800 | -1.78334000 | -0.66431200 |
| O | -1.49150100 | -0.89646500 | 1.69353900  |
| H | -1.88704000 | -1.28583700 | 2.48052100  |
| O | -1.92386900 | 1.40604200  | -0.76281900 |
| H | -2.05023200 | 2.13824300  | -0.15407400 |
| O | 0.66148500  | 2.10987500  | 0.39996500  |
| H | 1.59126400  | 2.34451500  | 0.31739800  |
| O | 2.65559700  | 0.10758100  | 0.07235500  |
| H | 3.16113400  | -0.24358900 | 0.80834400  |

Elimination ( $\beta$ -D-xylopyranose  $\rightarrow$  AXP2 + H<sub>2</sub>O)

Product (AXP2)

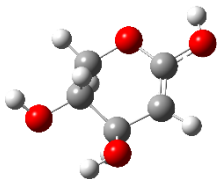

|   |             |             |             |
|---|-------------|-------------|-------------|
| C | -1.07566600 | -0.53305700 | -0.27914500 |
| C | -0.04602900 | -1.53217500 | 0.22802700  |
| C | 1.54375600  | 0.17377100  | 0.00987400  |
| C | 0.65168100  | 1.11971100  | 0.30264400  |
| C | -0.81454100 | 0.81940900  | 0.36148000  |

|   |             |             |             |
|---|-------------|-------------|-------------|
| H | -0.08306400 | -1.58211900 | 1.32195900  |
| H | -0.21008600 | -2.52736900 | -0.18462900 |
| H | -0.97061600 | -0.41486200 | -1.36417700 |
| H | 0.99362800  | 2.12997000  | 0.47294100  |
| H | -1.16697400 | 0.76594500  | 1.40233100  |
| O | 1.26153500  | -1.14158400 | -0.18565400 |
| O | 2.85895300  | 0.40728600  | -0.14017600 |
| H | 3.30976600  | -0.44278700 | -0.18242600 |
| O | -1.52378700 | 1.84298900  | -0.31443700 |
| H | -2.46167800 | 1.65251700  | -0.21106800 |
| O | -2.39167400 | -0.92365300 | 0.07209700  |
| H | -2.71150500 | -1.58116200 | -0.54995500 |

TS-AXP2

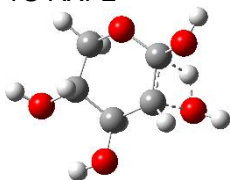

|   |             |             |             |
|---|-------------|-------------|-------------|
| C | -1.36970400 | -0.58128500 | -0.21315300 |
| C | -0.51714200 | -1.61622800 | 0.51548900  |
| C | 1.44120700  | -0.40393100 | 0.00381700  |
| C | 0.68289000  | 0.80474400  | -0.22830900 |
| C | -0.79859400 | 0.79942400  | 0.06473600  |
| H | -0.47655900 | -1.37294700 | 1.58764000  |
| H | -0.93892400 | -2.61624900 | 0.39839800  |
| H | -1.33194900 | -0.77886100 | -1.29172200 |
| H | 1.71686200  | 0.59495100  | 1.23888900  |
| H | 0.98957500  | 1.50718100  | -1.00118300 |
| H | -0.95289600 | 0.99800200  | 1.13235900  |
| O | 0.76517000  | -1.64646900 | -0.05328800 |
| O | 2.57138500  | -0.47732300 | -0.81309000 |
| H | 3.23204800  | -1.00082200 | -0.35473400 |
| O | 1.36870400  | 1.65958500  | 1.16490500  |
| H | 2.09050200  | 2.25386400  | 0.90774300  |
| O | -1.41147600 | 1.79904300  | -0.71608400 |
| H | -2.35964500 | 1.73454300  | -0.55996200 |
| O | -2.70848000 | -0.53608800 | 0.25217400  |
| H | -3.18675600 | -1.30459500 | -0.06831600 |

Elimination ( $\beta$ -D-xylopyranose  $\rightarrow$  AXP3 + H<sub>2</sub>O)

Product (AXP3)

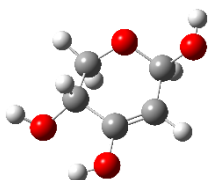

|   |             |             |             |
|---|-------------|-------------|-------------|
| C | -1.10659900 | -0.55398000 | -0.37992700 |
|---|-------------|-------------|-------------|

|   |             |             |             |
|---|-------------|-------------|-------------|
| C | -0.09260600 | -1.52971900 | 0.20584600  |
| C | 1.62278600  | 0.07653400  | 0.37067200  |
| C | 0.56832600  | 1.14003400  | 0.30498000  |
| C | -0.68465300 | 0.85156400  | -0.03187000 |
| H | -0.18988500 | -1.52337400 | 1.29979000  |
| H | -0.25924500 | -2.54477700 | -0.15795100 |
| H | -1.13674900 | -0.65322000 | -1.47206300 |
| H | 1.89309100  | -0.12796700 | 1.42069400  |
| H | 0.86105300  | 2.15229800  | 0.55258300  |
| O | 1.20058300  | -1.15067600 | -0.20339100 |
| O | 2.74090500  | 0.51050600  | -0.33392900 |
| H | 3.40388900  | -0.18602200 | -0.29250700 |
| O | -1.65307100 | 1.79307800  | -0.12026500 |
| H | -2.50350400 | 1.34076200  | -0.05070000 |
| O | -2.40883800 | -0.74071600 | 0.16410800  |
| H | -2.84801900 | -1.46193800 | -0.29215200 |

TS-AXP3

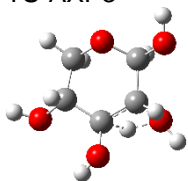

|   |             |             |             |
|---|-------------|-------------|-------------|
| C | -1.28508600 | -0.78159200 | -0.23305400 |
| C | -0.25543900 | -1.69845000 | 0.42169900  |
| C | 1.54844000  | -0.24488500 | 0.16894700  |
| C | 0.60699100  | 0.88222300  | -0.23973100 |
| C | -0.79697800 | 0.63499400  | -0.23018100 |
| H | -0.22119400 | -1.48990300 | 1.49982700  |
| H | -0.51403700 | -2.74759200 | 0.27609300  |
| H | -1.44893900 | -1.09848600 | -1.27280200 |
| H | 1.70698300  | -0.21701000 | 1.25565000  |
| H | 1.03022500  | 1.59446600  | -0.94323400 |
| H | -0.45388800 | 1.38210500  | 1.02698400  |
| O | 1.01481900  | -1.50236700 | -0.17397100 |
| O | 2.73393600  | -0.06522900 | -0.52773700 |
| H | 3.29375400  | -0.82974100 | -0.36010200 |
| O | 0.60708700  | 1.88424600  | 1.23773700  |
| H | 0.62118100  | 2.83340100  | 1.04717000  |
| O | -1.52378600 | 1.49227700  | -1.08810900 |
| H | -2.39995000 | 1.59102300  | -0.70691800 |
| O | -2.52432600 | -0.82610100 | 0.47258600  |
| H | -3.02794200 | -1.58592500 | 0.16974700  |

Elimination ( $\beta$ -D-xylopyranose  $\rightarrow$  AXP4 + H<sub>2</sub>O)

Product (AXP4)



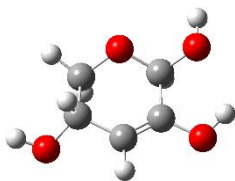

|   |             |             |             |
|---|-------------|-------------|-------------|
| C | -1.60516600 | 0.06556200  | -0.40374100 |
| C | -1.10293800 | -1.22263100 | 0.24691800  |
| C | 1.12904000  | -0.56284300 | 0.33457300  |
| C | 0.68620100  | 0.85351600  | 0.04709800  |
| C | -0.56895000 | 1.14110200  | -0.27871400 |
| H | -1.15511900 | -1.09678600 | 1.33655900  |
| H | -1.70906600 | -2.08302600 | -0.03909100 |
| H | -1.81404000 | -0.11536400 | -1.46629300 |
| H | 1.22860600  | -0.70164200 | 1.42488100  |
| H | -0.86544700 | 2.16426500  | -0.47661800 |
| O | 0.22365400  | -1.50810300 | -0.16351300 |
| O | 2.36592200  | -0.73664900 | -0.28756900 |
| H | 2.68762200  | -1.62262200 | -0.09656400 |
| O | 1.64580100  | 1.79805300  | 0.20736600  |
| H | 2.50257300  | 1.38080700  | 0.05485400  |
| O | -2.79041800 | 0.50753400  | 0.24719100  |
| H | -3.53612600 | 0.00213200  | -0.08542700 |

TS-AXP4

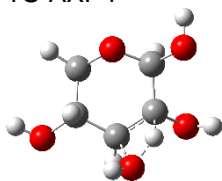

|   |             |             |             |
|---|-------------|-------------|-------------|
| C | 1.53050300  | -0.22490600 | 0.23015100  |
| C | 0.91748200  | -1.56704800 | -0.17190600 |
| C | -1.29697100 | -0.80094800 | -0.16586700 |
| C | -0.80526000 | 0.62028300  | -0.26860500 |
| C | 0.60314500  | 0.86943800  | -0.25141200 |
| H | 0.84813700  | -1.63604600 | -1.26608800 |
| H | 1.52420000  | -2.39762700 | 0.19476600  |
| H | 1.58628100  | -0.21611100 | 1.32432900  |
| H | -1.51061800 | -1.18234500 | -1.17925100 |
| H | -0.52380300 | 1.45851800  | 0.94841100  |
| H | 1.03064700  | 1.53389800  | -0.99615900 |
| O | -0.34541300 | -1.66524300 | 0.43939800  |
| O | -2.45469200 | -0.82936700 | 0.60666600  |
| H | -2.83375900 | -1.71214300 | 0.55095400  |
| O | -1.50197900 | 1.34662300  | -1.25981200 |
| H | -2.29757700 | 1.70394000  | -0.86052400 |
| O | 0.48569200  | 2.06675500  | 1.06365000  |
| H | 1.03777500  | 1.97607500  | 1.85517000  |
| O | 2.79809500  | 0.00481400  | -0.34901800 |

H 3.42571700 -0.63332600 0.00012400

Elimination ( $\beta$ -D-xylopyranose  $\rightarrow$  AXP5 + H<sub>2</sub>O)

Product (AXP5)

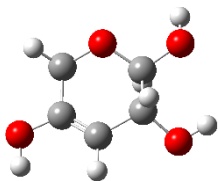

|   |             |             |             |
|---|-------------|-------------|-------------|
| C | -1.55443100 | 0.14313300  | -0.02794700 |
| C | -1.13457100 | -1.29412200 | 0.11818900  |
| C | 1.06718000  | -0.51929700 | 0.25887200  |
| C | 0.78024800  | 0.83683400  | -0.36642100 |
| C | -0.68826600 | 1.12493600  | -0.26157000 |
| H | -1.28675600 | -1.60570900 | 1.16162800  |
| H | -1.75926800 | -1.92206900 | -0.51841100 |
| H | 0.91353100  | -0.45308000 | 1.34861100  |
| H | 1.10229100  | 0.78965500  | -1.41524800 |
| H | -1.00450900 | 2.15724600  | -0.37202700 |
| O | 0.20455600  | -1.49682200 | -0.27729500 |
| O | 2.37694600  | -0.85926100 | -0.05196400 |
| H | 2.56840200  | -1.72760400 | 0.31459100  |
| O | 1.48682200  | 1.85583000  | 0.31692300  |
| H | 2.42613500  | 1.66775700  | 0.22223500  |
| O | -2.89864000 | 0.27367500  | 0.12360800  |
| H | -3.13835000 | 1.20526800  | 0.10617100  |

TS-AXP5

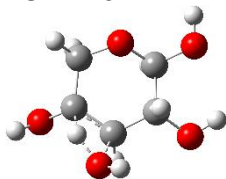

|   |             |             |             |
|---|-------------|-------------|-------------|
| C | 1.43052100  | -0.41980800 | -0.08948500 |
| C | 0.62576500  | -1.70243600 | 0.08418800  |
| C | -1.36071500 | -0.50292000 | -0.17637000 |
| C | -0.73974500 | 0.86133400  | 0.10243400  |
| C | 0.71182100  | 0.80118000  | -0.30889700 |
| H | 0.56715000  | -2.20815600 | -0.89169400 |
| H | 1.09550700  | -2.38605600 | 0.79096800  |
| H | 1.81414400  | 0.53990000  | 1.02795700  |
| H | -1.29269400 | -0.75291900 | -1.24794000 |
| H | -0.83515800 | 0.99768400  | 1.18694300  |
| H | 0.98098400  | 1.44066600  | -1.14410000 |
| O | -0.68413400 | -1.46429200 | 0.58361000  |
| O | -2.68425300 | -0.42573600 | 0.24396500  |
| H | -3.09112800 | -1.29262600 | 0.15254500  |

|   |             |             |             |
|---|-------------|-------------|-------------|
| O | -1.37237700 | 1.89872600  | -0.60421700 |
| H | -2.31626400 | 1.83769200  | -0.42097000 |
| O | 1.62714400  | 1.69282700  | 0.93987200  |
| H | 1.14661300  | 2.17083600  | 1.63299500  |
| O | 2.49588900  | -0.62972500 | -1.00136700 |
| H | 3.32277900  | -0.63990600 | -0.51793400 |

Elimination ( $\beta$ -D-xylopyranose  $\rightarrow$  AXP6 + H<sub>2</sub>O)

Product (AXP6)

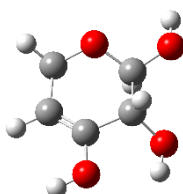

|   |             |             |             |
|---|-------------|-------------|-------------|
| C | 0.99900900  | 1.47450400  | 0.12806700  |
| C | -0.41415700 | 1.98011600  | 0.24004400  |
| C | -1.17599700 | -0.24195400 | 0.21322800  |
| C | 0.13852500  | -0.83756300 | -0.26987900 |
| C | 1.23184800  | 0.19122600  | -0.12366000 |
| H | -0.66598100 | 2.19365000  | 1.28985000  |
| H | -0.53909400 | 2.90370700  | -0.32672800 |
| H | 1.81140500  | 2.18439000  | 0.25064700  |
| H | -1.15918200 | -0.20245200 | 1.31504400  |
| H | 0.02470700  | -1.11331800 | -1.32627500 |
| O | -1.34342000 | 1.06118100  | -0.29848800 |
| O | -2.20898300 | -1.02948100 | -0.26067500 |
| H | -3.04016000 | -0.64174600 | 0.02856500  |
| O | 0.41017200  | -1.97168800 | 0.52381500  |
| H | 1.31612600  | -2.24407500 | 0.34865600  |
| O | 2.45725000  | -0.39107900 | -0.26919300 |
| H | 3.15430400  | 0.25669900  | -0.13098500 |

TS-AXP6

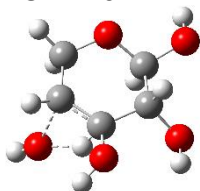

|   |             |             |             |
|---|-------------|-------------|-------------|
| C | -1.24084000 | -0.82112400 | -0.52519500 |
| C | -0.21327200 | -1.88853900 | -0.21884200 |
| C | 1.40514400  | -0.25845300 | 0.29425900  |
| C | 0.58691400  | 0.91527100  | -0.22084300 |
| C | -0.86973100 | 0.52359900  | -0.32008800 |
| H | -0.33036400 | -2.21349500 | 0.82087800  |
| H | -0.36009000 | -2.74693000 | -0.87360800 |
| H | -2.10402800 | -1.07276400 | -1.12897200 |
| H | 1.16258200  | -0.43846000 | 1.35538500  |
| H | 0.96546200  | 1.16829900  | -1.22027300 |

|   |             |             |             |
|---|-------------|-------------|-------------|
| H | -1.42256900 | 0.24615300  | 0.87566700  |
| O | 1.09596000  | -1.42178500 | -0.45484700 |
| O | 2.74234400  | 0.02788700  | 0.10986800  |
| H | 3.26154000  | -0.70871300 | 0.44515200  |
| O | 0.76480300  | 1.99766400  | 0.66384900  |
| H | 0.20326600  | 2.71413900  | 0.35259500  |
| O | -1.61892400 | 1.54353100  | -0.93242400 |
| H | -2.49304900 | 1.56287900  | -0.53200400 |
| O | -2.30666400 | -0.68893200 | 1.11005600  |
| H | -2.73112800 | -1.21656900 | 1.80463600  |

Elimination ( $\beta$ -D-xylopyranose  $\rightarrow$  AXP7 + H<sub>2</sub>O)

Product (AXP7)

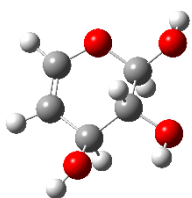

|   |             |             |             |
|---|-------------|-------------|-------------|
| C | -1.03767700 | 1.49752100  | -0.16083000 |
| C | 0.18192300  | 1.97919900  | 0.06858000  |
| C | 1.21027000  | -0.12722800 | -0.29239500 |
| C | -0.07807000 | -0.75188700 | 0.21216500  |
| C | -1.26736600 | 0.02381200  | -0.33611700 |
| H | 0.38880200  | 3.02972700  | 0.22902300  |
| H | -1.87536700 | 2.18200800  | -0.20897200 |
| H | 1.22333000  | -0.12394200 | -1.39219100 |
| H | -0.08446300 | -0.66974400 | 1.30717600  |
| H | -1.37960000 | -0.23545900 | -1.39770600 |
| O | 1.31258500  | 1.23458700  | 0.14001600  |
| O | 2.28100500  | -0.81344700 | 0.23533000  |
| H | 3.09269200  | -0.43963200 | -0.11958600 |
| O | -0.11450500 | -2.09206200 | -0.20722800 |
| H | -0.96133500 | -2.45066600 | 0.07753100  |
| O | -2.39627200 | -0.46242700 | 0.38207900  |
| H | -3.19939500 | -0.12073900 | -0.01800500 |

TS-AXP7

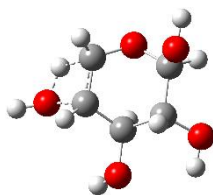

|   |             |             |             |
|---|-------------|-------------|-------------|
| C | -1.18883000 | -0.37149800 | -0.57716200 |
| C | -0.59112500 | -1.59923100 | -0.18425700 |
| C | 1.46471500  | -0.54990300 | 0.33722100  |
| C | 0.89989500  | 0.78357700  | -0.18479700 |
| C | -0.60308500 | 0.83378300  | 0.09038000  |
| H | -1.92496200 | -1.55412900 | 0.42566700  |
| H | -0.43326600 | -2.37855600 | -0.92320400 |
| H | -1.62391900 | -0.23485600 | -1.56220100 |
| H | 2.05776700  | -0.35302300 | 1.23391500  |
| H | 1.06849500  | 0.83582900  | -1.26764200 |
| H | -0.74590700 | 0.74535100  | 1.17195500  |
| O | 0.45260100  | -1.44143900 | 0.75667300  |
| O | 2.24218200  | -1.10208800 | -0.68778700 |
| H | 2.65300100  | -1.90314100 | -0.34862800 |
| O | 1.56136800  | 1.83659100  | 0.47530700  |
| H | 1.13570900  | 2.65615000  | 0.20201800  |
| O | -1.09692000 | 2.06315300  | -0.39373800 |
| H | -1.97025700 | 2.20879500  | -0.01888100 |
| O | -2.72886300 | -0.63725300 | 0.38131700  |
| H | -3.52734900 | -0.82592600 | -0.13189200 |

## 2. Optimized Cartesian coordinates for minima and TSs of 2-O-acetyl- $\beta$ -D-xylopyranose's initial reactions at the M06-2X/6-311++G(d,p) level

Ring-opening (2-O-acetyl- $\beta$ -D-xylopyranose  $\rightarrow$  OADXP)

Reactant (2-O-acetyl- $\beta$ -D-xylopyranose)

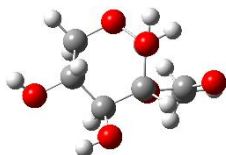

|   |             |             |             |
|---|-------------|-------------|-------------|
| C | 0.94247300  | -1.88759700 | -0.00260700 |
| C | -0.32336700 | -1.94751500 | -0.85195400 |
| C | -1.13084900 | -0.34696500 | 0.75927600  |
| C | 0.12839700  | 0.45862800  | 0.44041000  |
| C | 1.34579200  | -0.43098100 | 0.15647700  |
| H | -0.11989700 | -1.46794000 | -1.81695700 |
| H | -0.61872200 | -2.98256100 | -1.03585800 |
| H | 0.76876100  | -2.32032000 | 0.98570900  |
| H | -2.00023300 | 0.31212500  | 0.79529000  |
| H | 0.34421300  | 1.12385900  | 1.27635100  |
| H | 1.75796900  | -0.11210300 | -0.80961500 |
| O | -1.43034100 | -1.30257700 | -0.22580400 |
| O | -0.90004900 | -0.94053900 | 2.01022700  |
| H | -1.70648100 | -1.38976500 | 2.27900700  |
| O | -0.11128000 | 1.22167900  | -0.75060700 |
| O | 2.29428900  | -0.25155400 | 1.18356200  |
| H | 3.03530500  | -0.83534000 | 0.99218800  |
| O | 2.02930700  | -2.52950900 | -0.65443800 |
| H | 1.95140200  | -3.48004600 | -0.54387600 |
| C | -0.83562800 | 2.35336300  | -0.61909200 |
| C | -0.98909100 | 3.04502700  | -1.94328500 |
| H | -0.00455500 | 3.26780300  | -2.35597100 |
| H | -1.50043600 | 2.38047500  | -2.64107800 |
| H | -1.55912500 | 3.95993200  | -1.80697000 |
| O | -1.28297100 | 2.73063100  | 0.42811900  |

Product (OADXP)

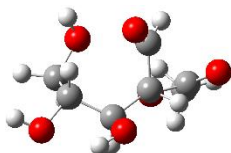

|   |             |             |             |
|---|-------------|-------------|-------------|
| C | 0.85112200  | -1.82815700 | -0.09176100 |
| C | -0.22503100 | -1.89193400 | -1.17586300 |
| C | -0.88821500 | 0.12795700  | 1.38608300  |
| C | 0.27610500  | 0.62275100  | 0.53398300  |
| C | 1.34822500  | -0.41336000 | 0.19151400  |
| H | 0.03807700  | -1.23326400 | -2.00546100 |
| H | -0.27970300 | -2.91677600 | -1.56257800 |
| H | 0.47090700  | -2.25741400 | 0.84249600  |
| H | -1.86116400 | 0.59333600  | 1.14827300  |
| H | 0.76815800  | 1.42336500  | 1.09606800  |
| H | 1.83297300  | -0.05911700 | -0.72924500 |
| O | -1.48798300 | -1.45896800 | -0.70112100 |
| O | -0.76633200 | -0.68001100 | 2.26365700  |
| H | -1.81517800 | -2.09704000 | -0.05976900 |
| O | -0.22190000 | 1.14060200  | -0.70155800 |
| O | 2.26646300  | -0.42111800 | 1.25914900  |
| H | 2.89293900  | -1.13155200 | 1.08417400  |
| O | 2.02387600  | -2.52075000 | -0.51272000 |

|   |             |             |             |
|---|-------------|-------------|-------------|
| H | 1.88087600  | -3.46766200 | -0.44391900 |
| C | -0.84190300 | 2.33891800  | -0.64985400 |
| C | -1.31769500 | 2.75412700  | -2.01112300 |
| H | -0.46785600 | 2.81694800  | -2.69192900 |
| H | -2.00109000 | 1.99731500  | -2.39885000 |
| H | -1.81692300 | 3.71651400  | -1.94016500 |
| O | -0.97651500 | 2.95939500  | 0.36835300  |

TS-OADXP

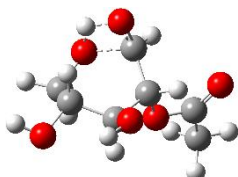

|   |             |             |             |
|---|-------------|-------------|-------------|
| C | 0.95037600  | -1.90784700 | 0.08510000  |
| C | -0.34066900 | -2.00236100 | -0.72661300 |
| C | -1.09286100 | -0.23598500 | 1.08895200  |
| C | 0.15343300  | 0.46562200  | 0.56972400  |
| C | 1.34618600  | -0.44847300 | 0.25993100  |
| H | -0.26480200 | -1.40656900 | -1.64158000 |
| H | -0.56416200 | -3.03827200 | -1.00093900 |
| H | 0.80137500  | -2.34138900 | 1.08153800  |
| H | -2.00052900 | 0.36857600  | 0.94840300  |
| H | 0.45232800  | 1.19548500  | 1.32873900  |
| H | 1.74627100  | -0.11661000 | -0.71081400 |
| O | -1.44549400 | -1.51112300 | 0.04131700  |
| O | -1.00285100 | -1.02061600 | 2.12679000  |
| H | -1.38581800 | -1.85129400 | 1.15805300  |
| O | -0.18190400 | 1.13658500  | -0.65376000 |
| O | 2.30729800  | -0.30048000 | 1.27565600  |
| H | 3.02550700  | -0.91558100 | 1.06081400  |
| O | 2.03573500  | -2.52130000 | -0.58921500 |
| H | 1.98020500  | -3.47836000 | -0.46225500 |
| C | -0.81702800 | 2.32675600  | -0.53171300 |
| C | -1.08388900 | 2.92815900  | -1.88482600 |
| H | -0.13990500 | 3.07562600  | -2.41521100 |
| H | -1.69497200 | 2.24320600  | -2.47790300 |
| H | -1.59835000 | 3.87931700  | -1.75980100 |
| O | -1.11146400 | 2.81133600  | 0.52939000  |

Elimination (2-O-acetyl- $\beta$ -D-xylopyranose  $\rightarrow$  AXPL1 + H<sub>2</sub>O)

Product (AXPL1)

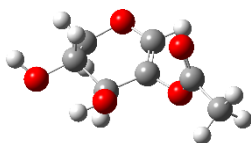

|   |             |             |             |
|---|-------------|-------------|-------------|
| C | 0.75829700  | -1.74699100 | -0.19790100 |
| C | -0.28546700 | -2.63380400 | -0.86509200 |
| C | -1.58994000 | -0.71126700 | -1.14096100 |
| C | -0.50583300 | 0.04945700  | -1.24995400 |
| C | 0.88427200  | -0.45258100 | -0.98228400 |
| H | 0.00017400  | -2.81132000 | -1.90923500 |
| H | -0.37753500 | -3.59184300 | -0.35339200 |
| H | 0.43738400  | -1.49059400 | 0.81854500  |
| H | -2.58831500 | -0.32395000 | -1.29426000 |
| H | 1.40503100  | -0.66752100 | -1.92680800 |
| O | -1.57313500 | -2.03190700 | -0.82300900 |
| O | -0.60044000 | 1.37813200  | -1.62694400 |
| O | 1.59202000  | 0.53454700  | -0.26350200 |
| H | 2.47751700  | 0.19229800  | -0.10654500 |
| O | 2.03724500  | -2.35674800 | -0.19946100 |
| H | 2.09147900  | -2.99659900 | 0.51437400  |
| C | -0.77014600 | 2.29604500  | -0.62113200 |
| C | -0.50984500 | 3.67701900  | -1.14450300 |
| H | 0.56248200  | 3.77571300  | -1.32398900 |
| H | -1.02423800 | 3.82404600  | -2.09389900 |
| H | -0.83171400 | 4.41004200  | -0.40977300 |
| O | -1.08472400 | 2.00254100  | 0.49031200  |

TS-AXPL1

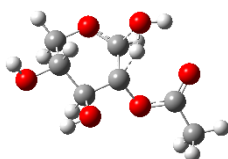

|   |             |             |             |
|---|-------------|-------------|-------------|
| C | 1.09569200  | -1.98032000 | 0.08125100  |
| C | -0.18210200 | -2.65226500 | -0.39400100 |
| C | -1.28307000 | -0.58637100 | 0.06886100  |
| C | -0.03855000 | 0.16855600  | -0.10984000 |
| C | 1.18719700  | -0.58344700 | -0.51391300 |
| H | -0.15182200 | -2.74950300 | -1.48362600 |
| H | -0.29833800 | -3.64302200 | 0.04503200  |
| H | 1.10380000  | -1.89207000 | 1.17400200  |
| H | -2.21014700 | -0.10919300 | -0.23465500 |
| H | -0.41380100 | 0.22328100  | 1.38580300  |
| H | 1.26926600  | -0.68667000 | -1.60934800 |
| O | -1.35879100 | -1.92307200 | -0.02850900 |
| O | -1.35766600 | -0.28235500 | 1.78435700  |
| H | -1.96124500 | 0.46508600  | 1.91497600  |
| O | -0.18329300 | 1.34593200  | -0.91396700 |
| O | 2.33311400  | 0.09069400  | -0.02871500 |
| H | 3.09894100  | -0.40985200 | -0.32921200 |
| O | 2.22197300  | -2.70880400 | -0.37847100 |
| H | 2.44281900  | -3.39675700 | 0.25308500  |
| C | -0.88943800 | 2.36015100  | -0.41738400 |
| C | -0.73315500 | 3.60104900  | -1.24923600 |



|   |             |            |             |
|---|-------------|------------|-------------|
| H | 0.27164900  | 3.99822600 | -1.09204300 |
| H | -0.83397600 | 3.36147300 | -2.30734000 |
| H | -1.47206300 | 4.33821200 | -0.94668500 |
| O | -1.57211300 | 2.27925000 | 0.57808300  |

Elimination (2-O-acetyl- $\beta$ -D-xylopyranose  $\rightarrow$  AXPL2 + CH<sub>3</sub>COOH)

Product (AXPL2)

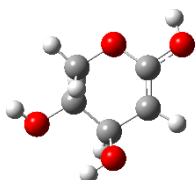

|   |             |             |             |
|---|-------------|-------------|-------------|
| C | 1.10759800  | -2.19603200 | 0.14139300  |
| C | -0.16520900 | -1.73041300 | -0.55050700 |
| C | -0.48140500 | -0.28221200 | 1.26294000  |
| C | 0.83029600  | -0.12253400 | 1.43684000  |
| C | 1.82363900  | -0.99213800 | 0.72940600  |
| H | 0.07843100  | -0.98445100 | -1.31519300 |
| H | -0.70129200 | -2.55914900 | -1.01241200 |
| H | 0.85221600  | -2.86964600 | 0.96799600  |
| H | 1.18122800  | 0.63250800  | 2.12481500  |
| H | 2.30154300  | -0.45292300 | -0.10202800 |
| O | -1.06061600 | -1.15993000 | 0.40148500  |
| O | -1.41482400 | 0.41180200  | 1.93666400  |
| H | -2.26851700 | 0.24074800  | 1.52483400  |
| O | 2.82085400  | -1.39866400 | 1.65025400  |
| H | 3.47370100  | -1.90385500 | 1.15515100  |
| O | 1.99574300  | -2.81506200 | -0.77285300 |
| H | 1.73299800  | -3.72771000 | -0.91271200 |

Product (CH<sub>3</sub>COOH)

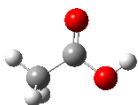

|   |             |            |             |
|---|-------------|------------|-------------|
| H | 0.14301300  | 1.39629600 | -0.09265200 |
| O | 0.02070100  | 1.95991900 | -0.86833000 |
| C | -1.30825000 | 2.10164900 | -1.05620500 |
| C | -1.60655100 | 2.96667300 | -2.24575800 |
| H | -1.15361700 | 3.94870100 | -2.10361500 |
| H | -1.16229800 | 2.52310900 | -3.13775700 |
| H | -2.68229900 | 3.05924400 | -2.36453400 |
| O | -2.11655400 | 1.58337100 | -0.33820000 |

TS-AXPL2

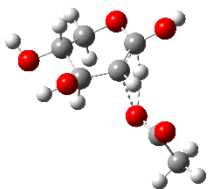

|   |             |             |             |
|---|-------------|-------------|-------------|
| C | 1.21185000  | -2.08818300 | 0.08947800  |
| C | -0.14808400 | -2.09704700 | -0.59974800 |
| C | -0.89914800 | -0.47587600 | 0.92585800  |
| C | 0.39672700  | 0.05227700  | 1.05864100  |
| C | 1.58045900  | -0.65371400 | 0.44109400  |
| H | -0.14011800 | -1.42385000 | -1.46656500 |
| H | -0.42583100 | -3.09827200 | -0.92595600 |
| H | 1.14963700  | -2.67130800 | 1.01669900  |
| H | -0.74611200 | 0.39368600  | 0.06430700  |
| H | 0.56742600  | 0.92472900  | 1.68780900  |
| H | 1.84616100  | -0.12554700 | -0.47897500 |
| O | -1.15023200 | -1.69590600 | 0.33163200  |
| O | -1.85449600 | -0.12919100 | 1.82515500  |
| H | -2.71963200 | -0.24620400 | 1.41725400  |
| O | 0.26513600  | 1.58995200  | -0.53105600 |
| O | 2.61014900  | -0.59160200 | 1.39752600  |
| H | 3.42986900  | -0.84560100 | 0.96329400  |
| O | 2.24103300  | -2.56133400 | -0.75327200 |
| H | 2.23878100  | -3.52153500 | -0.76670300 |
| C | 0.26177500  | 2.78266500  | -0.02022700 |
| C | -0.11546700 | 3.89565900  | -0.98189300 |
| H | 0.63046000  | 3.94519500  | -1.77727100 |
| H | -1.07576600 | 3.67078600  | -1.44856500 |
| H | -0.16226600 | 4.84726900  | -0.45689600 |
| O | 0.54161900  | 3.02191600  | 1.14918200  |

Elimination (2-O-acetyl- $\beta$ -D-xylopyranose  $\rightarrow$  AXPL3 + CH<sub>3</sub>COOH)

Product (AXPL3)

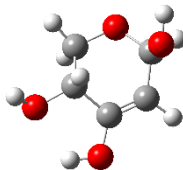

|   |             |             |             |
|---|-------------|-------------|-------------|
| C | 0.78260500  | -1.92642600 | 0.34590600  |
| C | -0.25307600 | -1.38199500 | -0.63938500 |
| C | -1.05910400 | -0.14164300 | 1.28792500  |
| C | 0.38226500  | 0.12641500  | 1.59748300  |
| C | 1.27468600  | -0.76591100 | 1.17869000  |
| H | 0.28149100  | -0.73861400 | -1.34651500 |
| H | -0.72067500 | -2.19986300 | -1.19259600 |
| H | 0.33772400  | -2.67862100 | 1.00604200  |

|   |             |             |             |
|---|-------------|-------------|-------------|
| H | -1.65146400 | 0.77529000  | 1.33315300  |
| H | 0.65472600  | 0.97231100  | 2.21249600  |
| O | -1.29100600 | -0.64991700 | -0.01441500 |
| O | -1.54244100 | -1.07129400 | 2.23826200  |
| H | -2.46783700 | -1.23841600 | 2.03016700  |
| O | 2.59214200  | -0.70705400 | 1.44438500  |
| H | 3.02983200  | -1.37180300 | 0.89545600  |
| O | 1.89608600  | -2.46181700 | -0.35563000 |
| H | 1.74755100  | -3.39000000 | -0.54582200 |

TS-AXPL3

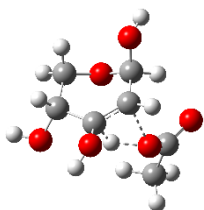

|   |             |             |             |
|---|-------------|-------------|-------------|
| C | 0.99079800  | -1.84021500 | -0.12398000 |
| C | -0.48159900 | -2.25370600 | -0.17640200 |
| C | -1.30720800 | -0.38304200 | 0.97680900  |
| C | 0.09996700  | 0.10103700  | 1.23863500  |
| C | 1.17290600  | -0.51782100 | 0.58867200  |
| H | -0.68116900 | -2.81364900 | -1.09013400 |
| H | -0.71055300 | -2.88332000 | 0.68824400  |
| H | 1.54802600  | -2.59251200 | 0.44713600  |
| H | -1.96908000 | 0.46835600  | 0.82104600  |
| H | 0.26389700  | 0.80771100  | 2.04139500  |
| H | 0.84159100  | 0.40062000  | -0.23746200 |
| O | -1.36260900 | -1.14065200 | -0.19723300 |
| O | -1.64314100 | -1.12666200 | 2.12088600  |
| H | -2.60156400 | -1.17079100 | 2.18515600  |
| O | 0.07752000  | 1.60436000  | -0.18910100 |
| O | 2.44704300  | -0.26834500 | 1.08434200  |
| H | 3.05346300  | -0.23693300 | 0.33748800  |
| O | 1.59376800  | -1.66820300 | -1.40155300 |
| H | 1.71658600  | -2.52617700 | -1.81632300 |
| C | -0.91569700 | 2.14407100  | -0.86170200 |
| C | -0.59997700 | 2.41988300  | -2.31545200 |
| H | 0.30502500  | 3.02377400  | -2.39112800 |
| H | -0.41045600 | 1.46995800  | -2.82028500 |
| H | -1.43823600 | 2.92982900  | -2.78458500 |
| O | -1.99843000 | 2.38126400  | -0.36345600 |

Elimination (2-O-acetyl- $\beta$ -D-xylopyranose  $\rightarrow$  AXPL4 + H<sub>2</sub>O)

Product (AXPL4)

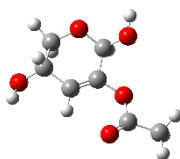

|   |             |             |             |
|---|-------------|-------------|-------------|
| C | 1.02299600  | -2.02012800 | -0.32324400 |
| C | -0.32501200 | -2.71932700 | -0.27098400 |
| C | -1.56624200 | -0.73239900 | -0.02481800 |
| C | -0.35723900 | 0.00758300  | -0.55564600 |
| C | 0.83461700  | -0.56649100 | -0.67950200 |
| H | -0.70621600 | -2.82008300 | -1.29560000 |
| H | -0.24221400 | -3.70865300 | 0.17568100  |
| H | 1.51537000  | -2.10517600 | 0.65359700  |
| H | -2.27629600 | -0.90367700 | -0.85190500 |
| H | 1.68879900  | -0.01821900 | -1.05025800 |
| O | -1.21377400 | -1.97143600 | 0.53555900  |
| O | -2.14736000 | 0.04172600  | 0.97083300  |
| H | -2.85412500 | -0.47912200 | 1.36502600  |
| O | -0.73971500 | 1.27846900  | -0.92158800 |
| O | 1.77787700  | -2.70104000 | -1.31269000 |
| H | 2.66674600  | -2.33819100 | -1.33734500 |
| C | 0.13172700  | 2.29474600  | -1.15562900 |
| C | -0.63233300 | 3.54996700  | -1.46290800 |
| H | -1.27796500 | 3.38339900  | -2.32602500 |
| H | -1.27012500 | 3.80091700  | -0.61444500 |
| H | 0.06870700  | 4.35544000  | -1.66346100 |
| O | 1.32170100  | 2.18689900  | -1.11382800 |

#### TS-AXPL4

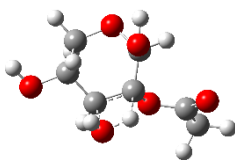

|   |             |             |             |
|---|-------------|-------------|-------------|
| C | 0.88762700  | -2.00425500 | -0.12093200 |
| C | -0.44598900 | -2.29490200 | -0.83134500 |
| C | -1.22065600 | -0.44535900 | 0.51808900  |
| C | -0.03203200 | 0.31075600  | 0.00292400  |
| C | 1.09598100  | -0.52838100 | -0.32089700 |
| H | -0.34549400 | -1.99589800 | -1.88275600 |
| H | -0.65824100 | -3.36659300 | -0.79732000 |
| H | 0.78326500  | -2.24498900 | 0.94092800  |
| H | -2.12381100 | 0.16362300  | 0.47709400  |
| H | 1.18348200  | 0.60995600  | 1.04382100  |
| H | 1.65613000  | -0.29303500 | -1.22195600 |
| O | -1.53931000 | -1.62627900 | -0.23264100 |
| O | -0.93385500 | -0.83390400 | 1.84856200  |
| H | -1.66918500 | -1.37663800 | 2.15028000  |
| O | -0.33508000 | 1.22607600  | -1.04999400 |
| O | 2.13750800  | 0.06691100  | 0.86286500  |

|   |             |             |             |
|---|-------------|-------------|-------------|
| H | 2.34704400  | -0.57569400 | 1.55933000  |
| O | 1.96670500  | -2.69858100 | -0.71077900 |
| H | 1.85896100  | -3.64096800 | -0.55604300 |
| C | -0.92821600 | 2.38477900  | -0.70561300 |
| C | -1.08701300 | 3.27488400  | -1.90911100 |
| H | -0.10570100 | 3.49806700  | -2.33024900 |
| H | -1.66697200 | 2.75806200  | -2.67468200 |
| H | -1.58733100 | 4.19320300  | -1.61365000 |
| O | -1.28917200 | 2.64843500  | 0.40763000  |

Elimination (2-O-acetyl- $\beta$ -D-xylopyranose  $\rightarrow$  AXPL5 + H<sub>2</sub>O)

Product (AXPL5)

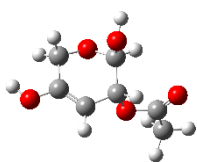

|   |             |             |             |
|---|-------------|-------------|-------------|
| C | 1.04348500  | -1.43394200 | -0.83697600 |
| C | -0.24201600 | -2.11746800 | -0.46717100 |
| C | -0.99039500 | -0.07574500 | 0.44295800  |
| C | 0.11173500  | 0.74375300  | -0.22873000 |
| C | 1.21398800  | -0.12108800 | -0.74235600 |
| H | -0.53809600 | -2.80588900 | -1.26483300 |
| H | -0.08248100 | -2.69877200 | 0.45070500  |
| H | -1.91265500 | 0.50495400  | 0.48889200  |
| H | 0.47299100  | 1.47264400  | 0.49826000  |
| H | 2.15649300  | 0.33080100  | -1.02463000 |
| O | -1.31732300 | -1.21874300 | -0.31072900 |
| O | -0.52655800 | -0.41249700 | 1.71964700  |
| H | -1.26599200 | -0.74199200 | 2.23771800  |
| O | -0.44288200 | 1.46180800  | -1.35303000 |
| O | 2.06337500  | -2.25102700 | -1.21570700 |
| H | 1.73051100  | -3.12797100 | -1.42502000 |
| C | -1.15120800 | 2.57136000  | -1.07549800 |
| C | -1.62204400 | 3.23784800  | -2.33755800 |
| H | -0.76017100 | 3.51038400  | -2.94785900 |
| H | -2.22752100 | 2.53729300  | -2.91389800 |
| H | -2.20136200 | 4.12167300  | -2.08444900 |
| O | -1.36684400 | 2.95808900  | 0.04217600  |

TS-AXPL5

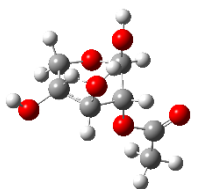

|   |             |             |             |
|---|-------------|-------------|-------------|
| C | 0.97726500  | -1.78636500 | -0.55941800 |
| C | -0.48008200 | -2.19506900 | -0.72707500 |
| C | -1.09331000 | -0.35709000 | 0.69432000  |
| C | 0.15703200  | 0.44946900  | 0.34430000  |
| C | 1.28189300  | -0.47791300 | -0.06157300 |
| H | -0.66058500 | -2.37103600 | -1.78915100 |
| H | -0.70690600 | -3.11871500 | -0.18436900 |
| H | 1.62226800  | -1.90997800 | 0.81953000  |
| H | -1.94337700 | 0.31164900  | 0.83934600  |
| H | 0.42300800  | 1.10634400  | 1.17319200  |
| H | 2.14592500  | 0.02096200  | -0.48836400 |
| O | -1.45354600 | -1.21234800 | -0.33206800 |
| O | -0.77556700 | -1.03645000 | 1.89588400  |
| H | -1.55765100 | -1.50318600 | 2.20475000  |
| O | -0.08912400 | 1.22902600  | -0.82564600 |
| O | 1.98368600  | -0.99646800 | 1.45370100  |
| H | 1.32564800  | -0.88924100 | 2.16096400  |
| O | 1.77676400  | -2.20718400 | -1.65154900 |
| H | 2.27292700  | -2.98351700 | -1.39001800 |
| C | -0.80155700 | 2.36586300  | -0.65931300 |
| C | -0.98764100 | 3.07311100  | -1.96921900 |
| H | -0.01560000 | 3.26692000  | -2.42356800 |
| H | -1.54772700 | 2.42723700  | -2.64694700 |
| H | -1.52441500 | 4.00302700  | -1.80311500 |
| O | -1.21548100 | 2.72686200  | 0.40732200  |

Elimination (2-O-acetyl- $\beta$ -D-xylopyranose  $\rightarrow$  AXPL6 + H<sub>2</sub>O)

Product (AXPL6)

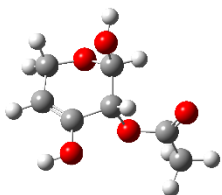

|   |             |             |             |
|---|-------------|-------------|-------------|
| C | 0.95741500  | -1.92260800 | 0.93618300  |
| C | -0.31840300 | -2.54602400 | 0.44823400  |
| C | -1.36706600 | -0.43631300 | 0.64022800  |
| C | -0.04789700 | 0.32539000  | 0.77587600  |
| C | 1.08200600  | -0.60768900 | 1.07354800  |
| H | -0.11346900 | -3.26551400 | -0.34607000 |
| H | -0.81092700 | -3.08003800 | 1.27023200  |
| H | 1.77211400  | -2.59199800 | 1.19610100  |
| H | -2.08657300 | 0.17440400  | 0.09145300  |
| H | -0.14876000 | 1.06667500  | 1.57062600  |
| O | -1.21578300 | -1.60341500 | -0.11728700 |
| O | -1.80482700 | -0.70422600 | 1.94382300  |
| H | -2.69980100 | -1.05231300 | 1.89856300  |

|   |             |             |             |
|---|-------------|-------------|-------------|
| O | 0.27202300  | 0.98826500  | -0.45465500 |
| O | 2.19274700  | 0.05964800  | 1.48791200  |
| H | 2.91482500  | -0.56175700 | 1.62052700  |
| C | -0.35523300 | 2.15824200  | -0.68787300 |
| C | 0.11943800  | 2.77125000  | -1.97406300 |
| H | 1.18779500  | 2.97880100  | -1.90046200 |
| H | -0.02609600 | 2.06395900  | -2.79118700 |
| H | -0.43146500 | 3.68900400  | -2.16092800 |
| O | -1.17902900 | 2.62262300  | 0.05207200  |

#### TS-AXPL6

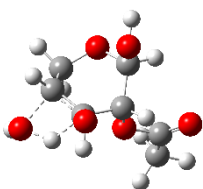

|   |             |             |             |
|---|-------------|-------------|-------------|
| C | 0.55911000  | -1.52487500 | -0.19082200 |
| C | -0.82810900 | -1.56519500 | -0.80114300 |
| C | -1.46936800 | -0.14330900 | 1.05231700  |
| C | -0.24021800 | 0.66136900  | 0.61950500  |
| C | 0.93023700  | -0.26075200 | 0.36846800  |
| H | -0.84984700 | -0.90581100 | -1.67459300 |
| H | -1.10003700 | -2.57336000 | -1.11082600 |
| H | 0.98209600  | -2.43691500 | 0.21615800  |
| H | -2.34948400 | 0.49584300  | 1.15828200  |
| H | 0.00424000  | 1.36918000  | 1.41016200  |
| H | 1.56552900  | -0.36500300 | -1.00331700 |
| O | -1.83019400 | -1.13309000 | 0.11129800  |
| O | -1.11658800 | -0.73281300 | 2.26858800  |
| H | -1.86148400 | -1.25993600 | 2.57066000  |
| O | -0.56757200 | 1.37355700  | -0.59479400 |
| O | 1.85485400  | -0.33000700 | 1.43125000  |
| H | 2.61828600  | 0.20464700  | 1.20770800  |
| O | 1.64342100  | -1.37493700 | -1.59659100 |
| H | 1.24571300  | -1.40376300 | -2.48031500 |
| C | -1.28528100 | 2.50684400  | -0.46299900 |
| C | -1.55215300 | 3.13254500  | -1.80367500 |
| H | -0.61096800 | 3.29384400  | -2.32994300 |
| H | -2.15914300 | 2.45279100  | -2.40393400 |
| H | -2.07613400 | 4.07411700  | -1.66341000 |
| O | -1.65131400 | 2.94008900  | 0.59485100  |

Elimination (2-O-acetyl- $\beta$ -D-xylopyranose  $\rightarrow$  AXPL7 + H<sub>2</sub>O)

Product (AXPL7)

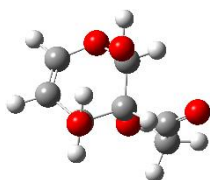

|   |             |             |             |
|---|-------------|-------------|-------------|
| C | 0.51112600  | -1.52655200 | -1.31172000 |
| C | -0.70438200 | -1.87100700 | -0.89882800 |
| C | -0.66792200 | -0.34537800 | 0.88978200  |
| C | 0.26316400  | 0.53072500  | 0.05425500  |
| C | 1.23827000  | -0.33787200 | -0.74659400 |
| H | -1.26911600 | -2.69724700 | -1.31092200 |
| H | 0.99006900  | -2.11423200 | -2.08355700 |
| H | -1.41091000 | 0.24683000  | 1.42357000  |
| H | 0.80744900  | 1.20766600  | 0.71370600  |
| H | 1.62039600  | 0.28042000  | -1.56188600 |
| O | -1.41106200 | -1.23276200 | 0.08244100  |
| O | 0.16488600  | -1.05003000 | 1.77269900  |
| H | -0.38190700 | -1.59571200 | 2.34551900  |
| O | -0.50626200 | 1.26815600  | -0.89640500 |
| O | 2.36764300  | -0.69573300 | 0.02454800  |
| H | 2.04957200  | -1.22500800 | 0.76514900  |
| C | -1.19419600 | 2.33356900  | -0.43465600 |
| C | -1.92796700 | 3.02034900  | -1.54959400 |
| H | -1.21503000 | 3.34865200  | -2.30685700 |
| H | -2.61216900 | 2.31411200  | -2.02155100 |
| H | -2.47501900 | 3.87016600  | -1.15081100 |
| O | -1.19672200 | 2.66217400  | 0.71968700  |

TS-AXPL7

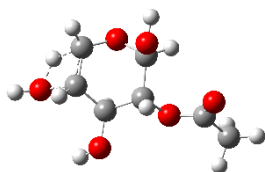

|   |             |             |             |
|---|-------------|-------------|-------------|
| C | 0.96769100  | -1.81172400 | 0.48609000  |
| C | -0.26633000 | -2.48700700 | 0.30070500  |
| C | -1.43037300 | -0.44836500 | 0.27760300  |
| C | -0.12653300 | 0.38319100  | 0.28876100  |
| C | 1.05494100  | -0.46527400 | -0.17273800 |
| H | 0.69819300  | -3.12957300 | -0.58387600 |
| H | -0.64408100 | -3.11931500 | 1.09799700  |
| H | 1.61093000  | -1.99312500 | 1.34082700  |
| H | -2.18633000 | 0.06081700  | -0.32522600 |
| H | 0.03778900  | 0.78259500  | 1.29108500  |
| H | 0.91778800  | -0.61880700 | -1.24833900 |



|   |             |             |             |
|---|-------------|-------------|-------------|
| O | -1.24865900 | -1.70321300 | -0.34960700 |
| O | -1.83156900 | -0.59291200 | 1.60640000  |
| H | -2.68085300 | -1.04448300 | 1.61766400  |
| O | -0.19271200 | 1.45775900  | -0.65092800 |
| O | 2.25414000  | 0.21292300  | 0.10208000  |
| H | 2.94781600  | -0.18998600 | -0.42825900 |
| O | 1.87791000  | -2.84031400 | -0.75058600 |
| H | 2.50501700  | -3.48708000 | -0.39757700 |
| C | -0.93946700 | 2.52423100  | -0.29621100 |
| C | -0.85101000 | 3.60729100  | -1.33305500 |
| H | 0.18212200  | 3.94966000  | -1.40705700 |
| H | -1.13981000 | 3.20985800  | -2.30662900 |
| H | -1.50117600 | 4.43049100  | -1.04972200 |
| O | -1.57636000 | 2.56701500  | 0.71890900  |

**3. Optimized Cartesian coordinates for minima and TSs of 4-methoxy-5-carboxy- $\beta$ -D-xylopyranose's initial reactions at the M06-2X/6-311++G(d,p) level**

Ring-opening (4-methoxy-5-carboxy- $\beta$ -D-xylopyranose  $\rightarrow$  DGLA)

Reactant (4-methoxy-5-carboxy- $\beta$ -D-xylopyranose)

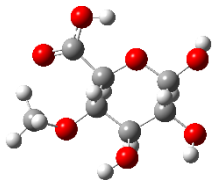

|   |             |             |             |
|---|-------------|-------------|-------------|
| C | -1.35669900 | -0.79061400 | -0.41907000 |
| C | -0.52005600 | -1.91939600 | 0.21856000  |
| C | 1.46303600  | -0.55005400 | 0.26094400  |
| C | 0.72188800  | 0.64017600  | -0.32410000 |
| C | -0.75283200 | 0.53468500  | 0.02533500  |
| H | -0.64335500 | -1.88548800 | 1.30779900  |
| H | -1.29497000 | -0.86683200 | -1.51409800 |
| H | 1.43186900  | -0.50684500 | 1.35986300  |
| H | 0.84435400  | 0.60913000  | -1.41555300 |
| H | -0.85840400 | 0.60251500  | 1.11881000  |
| O | 0.83561300  | -1.76258400 | -0.16280000 |
| O | 2.75139200  | -0.55714400 | -0.22206000 |
| H | 3.27902200  | -1.18140200 | 0.28371100  |
| O | 1.27689800  | 1.80939800  | 0.22137200  |
| H | 0.71652800  | 2.54413800  | -0.05072100 |
| O | -1.40032000 | 1.62661200  | -0.58913600 |
| H | -2.32942000 | 1.59033600  | -0.33816300 |
| O | -2.69298200 | -0.78377500 | 0.01097100  |
| C | -3.63365600 | -1.33347800 | -0.90221500 |
| H | -3.44960600 | -2.39423600 | -1.07740000 |
| H | -4.61290300 | -1.21541800 | -0.44201400 |
| H | -3.60852500 | -0.78477700 | -1.85020800 |
| C | -0.96615300 | -3.30023100 | -0.25497000 |
| O | -1.96509100 | -3.82076100 | 0.14454200  |
| O | -0.18309400 | -3.86144700 | -1.17910400 |
| H | 0.60202300  | -3.30489100 | -1.30034000 |

Product (DGL)

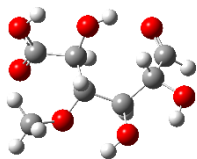

|   |             |             |             |
|---|-------------|-------------|-------------|
| C | -1.25606700 | -0.66089800 | -0.50379500 |
| C | -0.56177000 | -1.99720800 | -0.15040000 |
| C | 1.87746100  | 0.13028300  | 0.63224200  |
| C | 0.91504500  | 0.78968500  | -0.34453900 |
| C | -0.55541300 | 0.56363300  | 0.09954800  |
| H | -0.19046000 | -1.97031400 | 0.87816700  |
| H | -1.23536400 | -0.56447300 | -1.59862900 |
| H | 2.22415500  | 0.81270800  | 1.42854500  |
| H | 1.06552900  | 0.37733000  | -1.34933100 |
| H | -0.61187800 | 0.48195400  | 1.19537300  |
| O | 0.48364500  | -2.20988100 | -1.08035300 |
| O | 2.25483600  | -1.01257400 | 0.58121700  |
| H | 1.33222600  | -2.03331400 | -0.64499700 |
| O | 1.25000500  | 2.15196900  | -0.29453400 |
| H | 0.45286700  | 2.65810900  | -0.49462100 |
| O | -1.25233300 | 1.71757500  | -0.32393000 |
| H | -2.17918200 | 1.58244900  | -0.09516600 |

|   |             |             |             |
|---|-------------|-------------|-------------|
| O | -2.57782600 | -0.56526300 | -0.02760000 |
| C | -3.57500500 | -0.97817800 | -0.95011200 |
| H | -3.41488800 | -2.00120300 | -1.29832300 |
| H | -4.52486000 | -0.93756800 | -0.42107000 |
| H | -3.59788600 | -0.30073200 | -1.81146700 |
| C | -1.52714500 | -3.18503600 | -0.21937200 |
| O | -2.34577400 | -3.40871400 | 0.62026300  |
| O | -1.39526700 | -3.93559000 | -1.31906700 |
| H | -0.59537700 | -3.64306200 | -1.78505700 |

TS- DGL

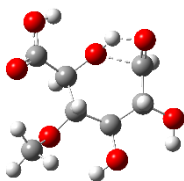

|   |             |             |             |
|---|-------------|-------------|-------------|
| C | -1.26227900 | -0.87138500 | -0.37477000 |
| C | -0.48280100 | -2.02249500 | 0.25725100  |
| C | 1.74979600  | -0.15859800 | 0.00155400  |
| C | 0.65094300  | 0.82106100  | -0.38446500 |
| C | -0.71539200 | 0.44908800  | 0.17419700  |
| H | -0.84162300 | -2.12185400 | 1.29013200  |
| H | -1.17492900 | -0.88950700 | -1.46857200 |
| H | 2.17703400  | 0.01482100  | 0.99508400  |
| H | 0.59683100  | 0.84695500  | -1.48014100 |
| H | -0.64495800 | 0.37693000  | 1.27020100  |
| O | 0.91049500  | -1.76120800 | 0.28949800  |
| O | 2.44545900  | -0.74623900 | -0.90653300 |
| H | 1.69133400  | -1.68931300 | -0.64616900 |
| O | 1.06922500  | 2.06195700  | 0.13435300  |
| H | 0.33140300  | 2.67460600  | 0.03258900  |
| O | -1.56298800 | 1.51890500  | -0.18481100 |
| H | -2.44579000 | 1.30370500  | 0.13648800  |
| O | -2.61277200 | -0.95797800 | 0.02139300  |
| C | -3.55124500 | -1.10900800 | -1.03882000 |
| H | -3.37364200 | -2.03952800 | -1.57878300 |
| H | -4.53537800 | -1.13447700 | -0.57388200 |
| H | -3.49535300 | -0.25735100 | -1.72542000 |
| C | -0.72285300 | -3.36983300 | -0.42523500 |
| O | -1.66070000 | -3.59998800 | -1.12728800 |
| O | 0.20277700  | -4.29766200 | -0.15231900 |
| H | 0.91196300  | -3.90398800 | 0.37442300  |

Ring contraction (4-methoxy-5-carboxy- $\beta$ -D-xylopyranose  $\rightarrow$  FFL1 + H<sub>2</sub>O)

Product (FFL1)

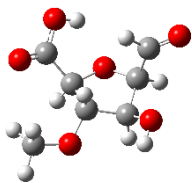

|   |             |             |             |
|---|-------------|-------------|-------------|
| C | -1.79862100 | 0.03602500  | -0.04819700 |
| C | -1.43891300 | -1.45074900 | 0.15659200  |
| C | 0.53096500  | -0.19642800 | 0.48297000  |
| C | 1.22846200  | 0.02153400  | -0.85417800 |
| C | -0.65061400 | 0.75463800  | 0.66133800  |
| H | -2.03736600 | -1.86248800 | 0.97592200  |
| H | -1.79547600 | 0.29093300  | -1.11755500 |
| H | 1.26948700  | -0.12538300 | 1.28042400  |
| H | 0.63580800  | -0.26144100 | -1.75070400 |
| H | -0.91088000 | 0.81546700  | 1.72465300  |
| O | -0.05517100 | -1.50029900 | 0.51772300  |
| O | 2.34484100  | 0.43748500  | -0.94954100 |
| O | -0.34439900 | 2.01391700  | 0.12829700  |
| H | -1.08432200 | 2.60516100  | 0.29594400  |
| O | -2.99264200 | 0.44997300  | 0.54675600  |
| C | -4.17011900 | 0.04645500  | -0.13765300 |
| H | -4.13520700 | 0.35871100  | -1.18627600 |
| H | -4.29686500 | -1.03825700 | -0.10653000 |
| H | -5.00126000 | 0.53466600  | 0.36724000  |
| C | -1.68616100 | -2.31401800 | -1.08111300 |
| O | -2.73229200 | -2.30088000 | -1.66095300 |
| O | -0.66031900 | -3.07643100 | -1.45787100 |
| H | 0.07693800  | -2.91829900 | -0.84750700 |

TS-FFL1

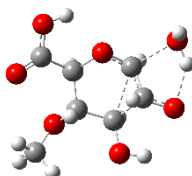

|   |             |             |             |
|---|-------------|-------------|-------------|
| C | -1.84006800 | -0.27805000 | -0.22561000 |
| C | -1.22007500 | -1.66446400 | -0.00080800 |
| C | 0.80874600  | -0.62677700 | 0.20605400  |
| C | 0.65653300  | 0.66493500  | -0.39638400 |
| C | -0.88454700 | 0.80828300  | 0.25354300  |
| H | -1.32289200 | -1.92528700 | 1.06071100  |
| H | -2.04683900 | -0.13320500 | -1.29254300 |
| H | 1.03776500  | -0.71269300 | 1.26877600  |
| H | 0.42927800  | 0.57071100  | -1.47779900 |
| H | -0.81135000 | 0.79038300  | 1.34804000  |
| O | 0.19240000  | -1.66883300 | -0.36316800 |
| O | 2.91730200  | -0.58119100 | 0.01582000  |

|   |             |             |             |
|---|-------------|-------------|-------------|
| O | 1.43968600  | 1.62840700  | 0.00494100  |
| H | 2.76341800  | 0.40318900  | 0.06232900  |
| O | -1.29624300 | 2.05629000  | -0.19305500 |
| H | -0.53521200 | 2.64686000  | -0.06293900 |
| O | -3.02148700 | -0.26462700 | 0.53087600  |
| H | 3.26373200  | -0.75511500 | -0.86512200 |
| C | -4.13264100 | 0.31569800  | -0.13840700 |
| H | -3.91468300 | 1.34778400  | -0.42516200 |
| H | -4.39246700 | -0.28058700 | -1.01793000 |
| H | -4.95959300 | 0.29892800  | 0.56865900  |
| C | -1.88484000 | -2.75250500 | -0.84412800 |
| O | -3.01944900 | -2.67456800 | -1.19675500 |
| O | -1.11104200 | -3.80381800 | -1.13141800 |
| H | -0.20050000 | -3.63988200 | -0.85364300 |

Ring contraction (4-methoxy-5-carboxy- $\beta$ -D-xylopyranose  $\rightarrow$  FFL2 + H<sub>2</sub>O)

Product (FFL2)

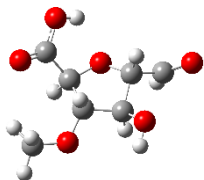

|   |             |             |             |
|---|-------------|-------------|-------------|
| C | 1.86466500  | -0.26952000 | 0.57079500  |
| C | 0.62079200  | -0.53517400 | -0.24999900 |
| C | -0.51644600 | 0.41609500  | 0.11037700  |
| C | -1.75585600 | -0.38441100 | -0.28794500 |
| C | -1.30175400 | -1.84489400 | -0.06276900 |
| O | 2.83124900  | 0.29031700  | 0.14530700  |
| O | -0.36467700 | 1.63392800  | -0.55786800 |
| O | -2.82442000 | 0.03022000  | 0.51068200  |
| O | 0.11659800  | -1.81695600 | 0.11937000  |
| H | 1.79333700  | -0.61992300 | 1.62032300  |
| H | 0.84993000  | -0.46933500 | -1.31999200 |
| H | -0.55117600 | 0.54943100  | 1.20136400  |
| H | -1.97655900 | -0.20729800 | -1.34943300 |
| H | -1.76484900 | -2.24467200 | 0.84377000  |
| H | -1.03760400 | 2.24357900  | -0.24126300 |
| C | -4.08808900 | -0.46393500 | 0.09223500  |
| H | -4.13690600 | -1.55305300 | 0.17441600  |
| H | -4.83018100 | -0.00720000 | 0.74385100  |
| H | -4.28580300 | -0.18879000 | -0.94878900 |
| C | -1.67152300 | -2.76813700 | -1.22456400 |
| O | -0.66209800 | -3.47033100 | -1.73711500 |
| O | -2.79303500 | -2.84437800 | -1.63301100 |
| H | 0.14086500  | -3.25245200 | -1.23839000 |

TS-FFL2

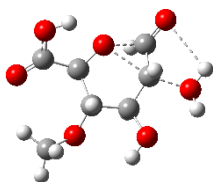

|   |             |             |             |
|---|-------------|-------------|-------------|
| C | 1.58976900  | -0.91952700 | 0.25611700  |
| C | 0.73802300  | 0.17698300  | -0.29803900 |
| C | -0.59382800 | 0.50362500  | 0.30403500  |
| C | -1.65809500 | -0.48273600 | -0.18727100 |
| C | -1.02960200 | -1.88370500 | -0.02369000 |
| O | 2.72714900  | -1.03642800 | -0.17477400 |
| O | 1.64701400  | 1.54631700  | 0.21153500  |
| O | -0.90217400 | 1.83543400  | -0.06445300 |
| O | -2.79752100 | -0.15627300 | 0.56186500  |
| O | 0.20023500  | -1.84038200 | -0.66745300 |
| H | 1.28094100  | -1.32728300 | 1.23184800  |
| H | 0.83918500  | 0.30565000  | -1.37032200 |
| H | -0.53594100 | 0.41777500  | 1.39711600  |
| H | -1.83133700 | -0.30078300 | -1.25861900 |
| H | -0.95765700 | -2.11208400 | 1.05338500  |
| H | 2.54380800  | 1.40398800  | -0.13587900 |
| H | 1.23465500  | 2.35545700  | -0.13148000 |
| H | -1.80500100 | 2.00696400  | 0.22895700  |
| C | -4.05604300 | -0.38242500 | -0.06555000 |
| H | -4.28129800 | -1.44590600 | -0.12126600 |
| H | -4.79745200 | 0.12462700  | 0.55008900  |
| H | -4.06260500 | 0.05407600  | -1.07100100 |
| C | -1.88133800 | -2.99893600 | -0.64998200 |
| O | -1.26435100 | -3.63103900 | -1.63938400 |
| O | -2.99128600 | -3.27159900 | -0.28415300 |
| H | -0.37714000 | -3.21826200 | -1.69926800 |

Elimination (4-methoxy-5-carboxy- $\beta$ -D-xylopyranose  $\rightarrow$  AXPL1 + H<sub>2</sub>O)

Product (AXPL1)

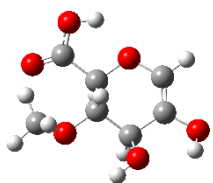

|   |             |             |             |
|---|-------------|-------------|-------------|
| C | -1.40860000 | -0.76808900 | -0.36304500 |
| C | -0.57456400 | -1.90082400 | 0.26880300  |

|   |             |             |             |
|---|-------------|-------------|-------------|
| C | 1.33209600  | -0.52428800 | -0.07305000 |
| C | 0.61424000  | 0.57943100  | 0.10663200  |
| C | -0.88417900 | 0.54549900  | 0.19429100  |
| H | -0.63746100 | -1.83401700 | 1.36030100  |
| H | -1.24953300 | -0.77165600 | -1.45093300 |
| H | 2.40913100  | -0.52963500 | -0.15361500 |
| H | -1.20523700 | 0.62872900  | 1.24192200  |
| O | 0.77734800  | -1.78569500 | -0.15453800 |
| O | 1.20769800  | 1.79480100  | 0.25377000  |
| H | 0.58187300  | 2.45824200  | -0.06336600 |
| O | -1.36973700 | 1.65465400  | -0.53994300 |
| H | -2.31878000 | 1.71334700  | -0.39150300 |
| O | -2.77236900 | -0.82881800 | -0.04869200 |
| C | -3.59911300 | -1.40630300 | -1.04927300 |
| H | -3.33158200 | -2.44598800 | -1.24617400 |
| H | -4.61649800 | -1.37388000 | -0.66461700 |
| H | -3.53866400 | -0.82362900 | -1.97515500 |
| C | -1.06801700 | -3.28247100 | -0.14634100 |
| O | -2.02854800 | -3.79142900 | 0.34791600  |
| O | -0.37784800 | -3.85698300 | -1.13646400 |
| H | 0.40900100  | -3.32097200 | -1.31785300 |

TS-AXPL1

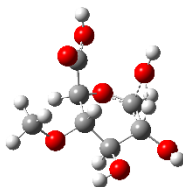

|   |             |             |             |
|---|-------------|-------------|-------------|
| C | 1.44275700  | -0.13524700 | 0.31369900  |
| C | 1.14215300  | -1.51059400 | -0.32400600 |
| C | -1.07857400 | -0.82409400 | -0.70817400 |
| C | -0.90438800 | 0.46219300  | -0.11785400 |
| C | 0.51885600  | 0.95016300  | -0.22357800 |
| H | 1.91698500  | -1.72876600 | -1.06428100 |
| H | 1.28946100  | -0.21102800 | 1.39538200  |
| H | -2.04328200 | -1.14026700 | -1.08969200 |
| H | -1.09442200 | -0.07961000 | 1.00545200  |
| H | 0.78048600  | 1.16118900  | -1.27114800 |
| O | -0.09342100 | -1.60080800 | -1.05175200 |
| O | -1.18332000 | -1.40768700 | 1.38389000  |
| H | -1.52637500 | -1.97712300 | 2.08122000  |
| O | -1.89659000 | 1.36990200  | -0.50778300 |
| H | -1.96724700 | 2.03225400  | 0.18487000  |
| O | 0.63632900  | 2.12197300  | 0.54906900  |
| H | 1.55225900  | 2.41318100  | 0.49331300  |
| O | 2.75219000  | 0.29925000  | 0.02795400  |
| C | 3.76906700  | -0.31862700 | 0.80018800  |
| H | 4.69228500  | 0.21380800  | 0.57801400  |
| H | 3.54249600  | -0.25135200 | 1.86803100  |
| H | 3.88622200  | -1.37504100 | 0.54073600  |
| C | 1.17190500  | -2.63961800 | 0.70565500  |

|   |            |             |            |
|---|------------|-------------|------------|
| O | 0.47472400 | -3.70781100 | 0.32006900 |
| O | 1.85779200 | -2.59887400 | 1.68769500 |
| H | 0.56544000 | -4.37342400 | 1.01507900 |

Elimination (4-methoxy-5-carboxy- $\beta$ -D-xylopyranose  $\rightarrow$  AXPL2 + H<sub>2</sub>O)

Product (AXPL2)

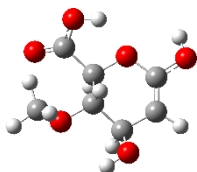

|   |             |             |             |
|---|-------------|-------------|-------------|
| C | -1.39226300 | -0.86741400 | -0.36483900 |
| C | -0.55668200 | -1.98827100 | 0.28150200  |
| C | 1.33318200  | -0.62444700 | -0.14069800 |
| C | 0.63672200  | 0.49238400  | 0.04151600  |
| C | -0.85741500 | 0.47108600  | 0.12877700  |
| H | -0.58772800 | -1.89891000 | 1.37069800  |
| H | -1.25308800 | -0.90636400 | -1.45509100 |
| H | 1.16228200  | 1.43374100  | 0.10854000  |
| H | -1.19103100 | 0.59357800  | 1.16924600  |
| O | 0.79176000  | -1.88294300 | -0.18288900 |
| O | 2.66108900  | -0.67191900 | -0.32719800 |
| H | 2.97598600  | -1.55375600 | -0.10008800 |
| O | -1.38117300 | 1.52377500  | -0.65678300 |
| H | -2.33128700 | 1.54620000  | -0.50206900 |
| O | -2.74909000 | -0.93822900 | -0.02441800 |
| C | -3.58307500 | -1.54747400 | -0.99876600 |
| H | -3.29993500 | -2.58591500 | -1.18618700 |
| H | -4.59385000 | -1.52904800 | -0.59616800 |
| H | -3.55066500 | -0.98060700 | -1.93557400 |
| C | -1.06440600 | -3.37178200 | -0.09961700 |
| O | -1.94284300 | -3.91511200 | 0.49705300  |
| O | -0.50151600 | -3.90622100 | -1.19201000 |
| H | 0.24558000  | -3.35706600 | -1.46820700 |

TS-AXPL2

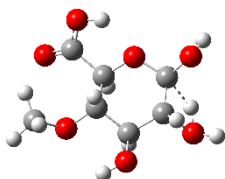

|   |             |             |             |
|---|-------------|-------------|-------------|
| C | -1.46701900 | -1.02945600 | -0.69393100 |
| C | -0.65579900 | -2.17288200 | -0.04881200 |
| C | 1.33227500  | -0.80944000 | -0.09100300 |
| C | 0.53583400  | 0.39182900  | -0.27397800 |
| C | -0.95662800 | 0.28246800  | -0.10148600 |



|   |             |             |             |
|---|-------------|-------------|-------------|
| H | -0.77606200 | -2.13778200 | 1.04107100  |
| H | -1.29021200 | -1.03874200 | -1.77937300 |
| H | 1.46224200  | 0.19110400  | 1.32372400  |
| H | 0.85008000  | 1.15351000  | -0.98824400 |
| H | -1.19223300 | 0.25228300  | 0.96960600  |
| O | 0.68818200  | -2.04107300 | -0.43668900 |
| O | 2.51789800  | -0.74766300 | -0.82910900 |
| H | 3.19766900  | -1.21488200 | -0.33998600 |
| O | 1.05202700  | 1.16343400  | 1.17603000  |
| H | 1.75724300  | 1.80916200  | 1.00954700  |
| O | -1.56204600 | 1.39725600  | -0.70683200 |
| H | -2.51332500 | 1.28847800  | -0.59803200 |
| O | -2.84000800 | -1.06033500 | -0.40608100 |
| C | -3.66103600 | -1.62103300 | -1.42121600 |
| H | -3.41609500 | -2.66803900 | -1.60534200 |
| H | -4.68510500 | -1.55811400 | -1.05809000 |
| H | -3.56589300 | -1.04465500 | -2.34828300 |
| C | -1.13048000 | -3.54323600 | -0.52564800 |
| O | -2.12300300 | -4.06323400 | -0.10793800 |
| O | -0.37457000 | -4.09483100 | -1.47797500 |
| H | 0.41296700  | -3.53822400 | -1.59651500 |

Elimination (4-methoxy-5-carboxy- $\beta$ -D-xylopyranose  $\rightarrow$  AXPL3 + H<sub>2</sub>O)

Product (AXPL3)

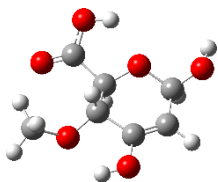

|   |             |             |             |
|---|-------------|-------------|-------------|
| C | -1.33352400 | -0.81160200 | -0.56611100 |
| C | -0.53217800 | -1.89876400 | 0.17093500  |
| C | 1.46474200  | -0.57777200 | 0.29713200  |
| C | 0.61678100  | 0.62827400  | 0.06067800  |
| C | -0.65062900 | 0.52185300  | -0.32514800 |
| H | -0.69695500 | -1.78459200 | 1.24868200  |
| H | -1.33203200 | -1.02041300 | -1.64592200 |
| H | 1.65180600  | -0.72043100 | 1.37279700  |
| H | 1.06549900  | 1.59725100  | 0.23647900  |
| O | 0.83124500  | -1.76871200 | -0.17496900 |
| O | 2.66297100  | -0.44091000 | -0.38686000 |
| H | 3.26420800  | -1.13584700 | -0.10177700 |
| O | -1.42724500 | 1.60179900  | -0.55422300 |
| H | -2.34411800 | 1.31697800  | -0.43612000 |
| O | -2.65475700 | -0.68213700 | -0.09722600 |
| C | -3.66275800 | -1.29035200 | -0.90007500 |
| H | -3.56722400 | -2.37561700 | -0.89898100 |
| H | -4.61522300 | -1.01148900 | -0.45321800 |
| H | -3.61559400 | -0.90537600 | -1.92460000 |
| C | -0.97148400 | -3.30736500 | -0.22653600 |

|   |             |             |             |
|---|-------------|-------------|-------------|
| O | -2.02056900 | -3.76812900 | 0.11599000  |
| O | -0.11837600 | -3.96821700 | -1.00928600 |
| H | 0.67950600  | -3.42777600 | -1.12115300 |

### TS-AXPL3

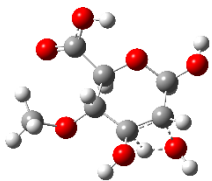

|   |             |             |             |
|---|-------------|-------------|-------------|
| C | -1.37313100 | -1.12735900 | -0.94485400 |
| C | -0.51856800 | -2.25718900 | -0.33595300 |
| C | 1.44253600  | -0.95037700 | -0.12956300 |
| C | 0.67171900  | 0.31233200  | -0.47992700 |
| C | -0.73672500 | 0.20591100  | -0.65769500 |
| H | -0.62550200 | -2.24189600 | 0.75473700  |
| H | -1.42699200 | -1.26801800 | -2.03657800 |
| H | 1.44081900  | -1.10103600 | 0.95688700  |
| H | 1.24420800  | 1.06276000  | -1.01932400 |
| H | -0.48654300 | 0.72795300  | 0.73219200  |
| O | 0.83575300  | -2.08206100 | -0.73004100 |
| O | 2.72204200  | -0.82012600 | -0.63393700 |
| H | 3.24241000  | -1.58199900 | -0.36140100 |
| O | 0.58196400  | 1.09026400  | 1.11681100  |
| H | 0.69754500  | 2.05132700  | 1.08196400  |
| O | -1.28782100 | 1.24921800  | -1.43324800 |
| H | -2.18008500 | 1.39742900  | -1.10830100 |
| O | -2.67964800 | -1.11393400 | -0.41063100 |
| C | -3.68418600 | -1.66161300 | -1.25021800 |
| H | -3.52681700 | -2.72621200 | -1.43302800 |
| H | -4.62836200 | -1.53039200 | -0.72406100 |
| H | -3.72389200 | -1.12203700 | -2.20346800 |
| C | -0.96078900 | -3.62859700 | -0.83447200 |
| O | -1.91980900 | -4.19259300 | -0.39964000 |
| O | -0.22249700 | -4.13574500 | -1.82818600 |
| H | 0.54161500  | -3.55961700 | -1.97805700 |

Elimination (4-methoxy-5-carboxy- $\beta$ -D-xylopyranose  $\rightarrow$  AXPL4 + H<sub>2</sub>O)

### Product (AXPL4)

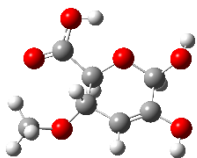

|   |             |             |             |
|---|-------------|-------------|-------------|
| C | -1.28330100 | -0.91762900 | -0.56742800 |
| C | -0.45096700 | -2.00826500 | 0.13376800  |
| C | 1.51451400  | -0.65653200 | 0.35446600  |

|   |             |             |             |
|---|-------------|-------------|-------------|
| C | 0.64307900  | 0.53867600  | 0.06154900  |
| C | -0.60529500 | 0.41233400  | -0.37808500 |
| H | -0.64782200 | -1.93956900 | 1.21003400  |
| H | -1.37201100 | -1.15437900 | -1.63709400 |
| H | 1.62573100  | -0.76588900 | 1.44426400  |
| H | -1.22202600 | 1.28710400  | -0.56178300 |
| O | 0.92489800  | -1.83968800 | -0.15688000 |
| O | 2.73819900  | -0.48508700 | -0.26095100 |
| H | 3.36603400  | -1.11083000 | 0.11042600  |
| O | 1.27943500  | 1.69573000  | 0.35593200  |
| H | 0.67707500  | 2.43615100  | 0.23462300  |
| O | -2.56263000 | -0.84525900 | 0.01936500  |
| C | -3.63101500 | -1.30406700 | -0.79264200 |
| H | -3.52588500 | -2.36494400 | -1.02793900 |
| H | -4.54112200 | -1.15528500 | -0.21420200 |
| H | -3.69477600 | -0.71823000 | -1.71691700 |
| C | -0.84793800 | -3.40682000 | -0.33557600 |
| O | -1.91799000 | -3.88057300 | -0.09172300 |
| O | 0.06679700  | -4.04509300 | -1.06927400 |
| H | 0.86220100  | -3.49338500 | -1.12152900 |

#### TS-AXPL4

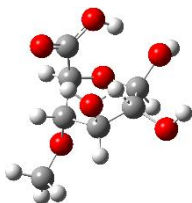

|   |             |             |             |
|---|-------------|-------------|-------------|
| C | -1.67079200 | -1.47418000 | 0.09004800  |
| C | -0.60258100 | -2.51808000 | 0.41644900  |
| C | 0.90001200  | -0.81439500 | 1.22941700  |
| C | 0.36775700  | 0.02117100  | 0.09797800  |
| C | -0.99853600 | -0.17899900 | -0.34404400 |
| H | -1.10710300 | -3.39563300 | 0.82781500  |
| H | -2.31982400 | -1.86995300 | -0.69960200 |
| H | 0.82092000  | -0.28061700 | 2.18144800  |
| H | 0.35418900  | -0.34061600 | -1.46731700 |
| H | -1.64725400 | 0.69200100  | -0.38062000 |
| O | 0.26361700  | -2.06653300 | 1.42159000  |
| O | 2.27933700  | -1.07105100 | 0.96858200  |
| H | 2.71592800  | -1.26893900 | 1.80375300  |
| O | 0.69981700  | 1.38328700  | 0.30510700  |
| H | 1.53354500  | 1.55666900  | -0.13537200 |
| O | -0.65069600 | -0.33866300 | -1.97293100 |
| H | -0.87448300 | -1.20950800 | -2.35281800 |
| O | -2.40021300 | -1.24844800 | 1.26801000  |
| C | -3.68937300 | -0.70957700 | 1.05043800  |
| H | -4.29057200 | -1.38008500 | 0.42607900  |
| H | -4.15672900 | -0.61204700 | 2.02821900  |
| H | -3.64723100 | 0.27768800  | 0.57904700  |
| C | 0.10784300  | -2.98659700 | -0.86394600 |
| O | -0.53726300 | -3.27981600 | -1.84103200 |

|   |            |             |             |
|---|------------|-------------|-------------|
| O | 1.42419500 | -3.06823300 | -0.84629500 |
| H | 1.81233400 | -2.60020800 | -0.08026900 |

Elimination (4-methoxy-5-carboxy- $\beta$ -D-xylopyranose  $\rightarrow$  AXPL5 + H<sub>2</sub>O)

Product (AXPL5)

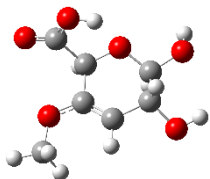

|   |             |             |             |
|---|-------------|-------------|-------------|
| C | -1.30421800 | -1.25740600 | -0.21269500 |
| C | -0.33025300 | -2.29892300 | 0.31014800  |
| C | 1.29207600  | -0.55739500 | 0.32716400  |
| C | 0.55349900  | 0.30948600  | -0.67436800 |
| C | -0.89567600 | -0.07681500 | -0.68360200 |
| H | -0.51261300 | -2.46255200 | 1.37808800  |
| H | 0.96001600  | -0.31192400 | 1.34631000  |
| H | 1.01859200  | 0.14727600  | -1.65677200 |
| H | -1.58785000 | 0.66646000  | -1.05658700 |
| O | 1.01203400  | -1.92463300 | 0.06497100  |
| O | 2.65011200  | -0.35082500 | 0.15877600  |
| H | 3.13516100  | -0.83188500 | 0.83597400  |
| O | 0.64441000  | 1.67171200  | -0.30919400 |
| H | 1.57224300  | 1.92477900  | -0.35103900 |
| O | -2.56851100 | -1.69932900 | -0.10859700 |
| C | -3.59429800 | -0.81796000 | -0.52707000 |
| H | -3.49010600 | -0.58404900 | -1.59042900 |
| H | -4.53017600 | -1.34261900 | -0.35473200 |
| H | -3.56918800 | 0.10675200  | 0.05684600  |
| C | -0.56023500 | -3.64543800 | -0.39758000 |
| O | -1.37806700 | -4.43076900 | -0.03418700 |
| O | 0.21729000  | -3.84340800 | -1.46727500 |
| H | 0.87959200  | -3.13708700 | -1.50158100 |

TS-AXPL5

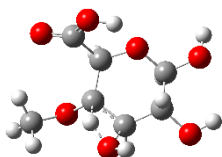

|   |             |             |             |
|---|-------------|-------------|-------------|
| C | -1.30148400 | -0.97350100 | -0.19363000 |
| C | -0.38799700 | -2.10378400 | 0.29286300  |
| C | 1.35825000  | -0.52054400 | 0.61108000  |
| C | 0.76426300  | 0.49270300  | -0.35840700 |
| C | -0.73635200 | 0.35555900  | -0.28319400 |
| H | -0.63399700 | -2.32560600 | 1.33924500  |

|   |             |             |             |
|---|-------------|-------------|-------------|
| H | -1.48755200 | -0.42478100 | -1.69949700 |
| H | 0.98243800  | -0.36682500 | 1.63322400  |
| H | 1.13890100  | 0.19193700  | -1.34653200 |
| H | -1.22664700 | 1.15738800  | 0.26321000  |
| O | 1.00256300  | -1.80729900 | 0.16237700  |
| O | 2.73595100  | -0.38121800 | 0.54043000  |
| H | 3.15331500  | -0.97419700 | 1.17264000  |
| O | 1.12275200  | 1.81489500  | -0.05563300 |
| H | 2.08343600  | 1.84970800  | 0.01217700  |
| O | -1.35381300 | 0.68701100  | -1.83802100 |
| H | -0.73752800 | 1.00767000  | -2.51676600 |
| O | -2.51633700 | -1.00293900 | 0.51211100  |
| C | -3.64492000 | -1.41652900 | -0.24378000 |
| H | -3.49146700 | -2.41375000 | -0.66096200 |
| H | -4.48906600 | -1.43668900 | 0.44541900  |
| H | -3.85498300 | -0.70273000 | -1.04795600 |
| C | -0.65238800 | -3.37090500 | -0.51837000 |
| O | -1.64526900 | -4.02087600 | -0.37807100 |
| O | 0.27762300  | -3.67463600 | -1.43298900 |
| H | 1.02222300  | -3.06559100 | -1.32249800 |

Elimination (4-methoxy-5-carboxy- $\beta$ -D-xylopyranose  $\rightarrow$  AXPL6 + CH<sub>3</sub>OH)

Product (AXPL6)

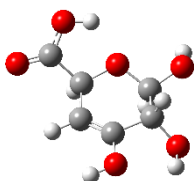

|   |             |             |             |
|---|-------------|-------------|-------------|
| C | -0.96285200 | -0.74708900 | -0.18746600 |
| C | -0.12623000 | -1.94986500 | 0.15841200  |
| C | 1.79204500  | -0.53730400 | 0.19436100  |
| C | 1.11325900  | 0.60621600  | -0.54225300 |
| C | -0.38103800 | 0.39748800  | -0.52875000 |
| H | -0.20175200 | -2.18223300 | 1.22967200  |
| H | -2.03946100 | -0.87639000 | -0.16363800 |
| H | 1.63350700  | -0.41047000 | 1.27513800  |
| H | 1.47843900  | 0.61542000  | -1.57781700 |
| O | 1.22890800  | -1.77948800 | -0.20890400 |
| O | 3.12720200  | -0.54553000 | -0.14347200 |
| H | 3.60012700  | -1.14246100 | 0.44318900  |
| O | 1.46170000  | 1.79346300  | 0.12986100  |
| H | 0.90355900  | 2.50186400  | -0.20615600 |
| O | -1.02156900 | 1.54043300  | -0.89392500 |
| H | -1.97555000 | 1.41832200  | -0.86630200 |
| C | -0.67207400 | -3.17245100 | -0.58926300 |
| O | -1.77554800 | -3.58118000 | -0.38121500 |
| O | 0.15300200  | -3.71730600 | -1.48003600 |
| H | 0.98262500  | -3.21437700 | -1.47844100 |

Product (CH<sub>3</sub>OH)

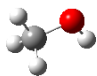

|   |             |             |             |
|---|-------------|-------------|-------------|
| H | -2.28324100 | -1.16175200 | 0.08977100  |
| O | -3.18987700 | -0.97679300 | 0.34082400  |
| C | -4.04685100 | -1.37879000 | -0.71031200 |
| H | -3.97335800 | -2.45243800 | -0.91203400 |
| H | -5.06402700 | -1.15806300 | -0.39002800 |
| H | -3.84844800 | -0.82741500 | -1.63522400 |

TS-AXPL6

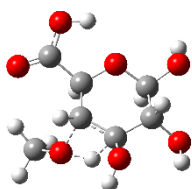

|   |             |             |             |
|---|-------------|-------------|-------------|
| C | -1.34602300 | -0.56981800 | -0.13067600 |
| C | -0.40662700 | -1.64019400 | 0.41934100  |
| C | 1.48878100  | -0.24897700 | 0.14240700  |
| C | 0.72836000  | 0.83098200  | -0.60385800 |
| C | -0.76157100 | 0.71114900  | -0.40479600 |
| H | -0.35941300 | -1.56685200 | 1.51402000  |
| H | -2.18623400 | -0.91873000 | -0.72400700 |
| H | 1.44066000  | -0.06361200 | 1.22684000  |
| H | 0.96290700  | 0.70898900  | -1.67179500 |
| H | -1.46604400 | 0.82212200  | 1.00218500  |
| O | 0.88665300  | -1.52187900 | -0.12034300 |
| O | 2.78401000  | -0.29372200 | -0.32012300 |
| H | 3.32264600  | -0.81168200 | 0.28388200  |
| O | 1.23360100  | 2.07208200  | -0.14840200 |
| H | 0.73607800  | 2.75835400  | -0.60200400 |
| O | -1.41980600 | 1.49141000  | -1.39253100 |
| H | -2.10055500 | 2.02000600  | -0.97353600 |
| O | -2.23881600 | 0.00903400  | 1.23677200  |
| C | -2.55777400 | -0.66826700 | 2.45990800  |
| H | -2.77899600 | -1.70826200 | 2.21394300  |
| H | -1.72265700 | -0.61538900 | 3.16202400  |
| H | -3.43769900 | -0.20028000 | 2.90119700  |
| C | -0.93944900 | -3.04012600 | 0.11226100  |
| O | -2.02472500 | -3.38123700 | 0.48347000  |
| O | -0.12161900 | -3.82759700 | -0.57594500 |
| H | 0.68589200  | -3.33022100 | -0.78357500 |

Elimination (4-methoxy-5-carboxy-β-D-xylopyranose → AXPL7 + CH<sub>3</sub>OH)

Product (AXPL7)

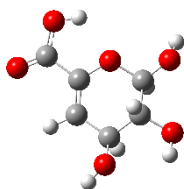

|   |             |             |             |
|---|-------------|-------------|-------------|
| C | -0.83943400 | -0.81708300 | -0.35204400 |
| C | -0.00993100 | -1.84436800 | -0.50729400 |
| C | 1.90964300  | -0.54957200 | 0.09032500  |
| C | 1.15892800  | 0.64601700  | -0.47126200 |
| C | -0.31200200 | 0.56171900  | -0.08395900 |
| H | -1.90370300 | -1.00503700 | -0.42580900 |
| H | 1.80282900  | -0.58910900 | 1.18265500  |
| H | 1.23504800  | 0.60830300  | -1.56626500 |
| H | -0.39414900 | 0.80054100  | 0.98552500  |
| O | 1.35031000  | -1.76958300 | -0.43671500 |
| O | 3.22200500  | -0.48950200 | -0.30487300 |
| H | 3.75490800  | -1.07277600 | 0.24173400  |
| O | 1.74819400  | 1.80678200  | 0.05155900  |
| H | 1.23857700  | 2.55550900  | -0.27529300 |
| O | -0.95970500 | 1.56915200  | -0.84521100 |
| H | -1.86608000 | 1.67066900  | -0.54362200 |
| C | -0.50267700 | -3.23488600 | -0.80844700 |
| O | -1.66322600 | -3.50929900 | -0.87347000 |
| O | 0.46383800  | -4.13842300 | -1.00229800 |
| H | 1.32570100  | -3.70757900 | -0.91592400 |

TS-AXPL7

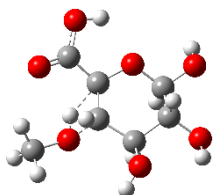

|   |             |             |             |
|---|-------------|-------------|-------------|
| C | -0.91930900 | -0.95577100 | -0.56657500 |
| C | -0.02727400 | -2.12053100 | -0.29519500 |
| C | 1.90894400  | -0.74724200 | -0.03315600 |
| C | 1.21297300  | 0.40971900  | -0.73941800 |
| C | -0.26363200 | 0.40241700  | -0.35732000 |
| H | -1.18551400 | -1.94381600 | 0.93312100  |
| H | -1.56480300 | -0.99619300 | -1.44884300 |
| H | 1.74623100  | -0.68338200 | 1.05542200  |
| H | 1.33012200  | 0.25461100  | -1.82010000 |
| H | -0.30266800 | 0.63061400  | 0.71420600  |
| O | 1.36262000  | -1.95442800 | -0.51317700 |
| O | 3.24921700  | -0.71703000 | -0.36021600 |
| H | 3.70430600  | -1.39784900 | 0.14313600  |
| O | 1.79207700  | 1.61857200  | -0.32257900 |
| H | 1.30414800  | 2.32999700  | -0.74961300 |
| O | -0.88941100 | 1.43620400  | -1.09822300 |
| H | -1.65747800 | 1.75917400  | -0.62121000 |
| O | -1.88254600 | -1.16983700 | 0.62210900  |
| C | -3.27513400 | -1.50351700 | 0.36567900  |
| H | -3.31766800 | -2.28960100 | -0.38517900 |
| H | -3.68354700 | -1.83665600 | 1.31669000  |
| H | -3.77336900 | -0.59132000 | 0.04424000  |
| C | -0.50386500 | -3.37670900 | -0.86124300 |
| O | -1.67936500 | -3.61148400 | -1.07107700 |
| O | 0.43123500  | -4.31256800 | -1.09861800 |
| H | 1.29997300  | -3.90982400 | -0.96208200 |



**Table S1.** Heat capacity,  $C_v$ , in kcal mol<sup>-1</sup> K<sup>-1</sup> at different temperatures of chemical species involved in the initial elementary reactions: ring-opening, ring-contraction, and elimination.

| Species           | T/K | 200     | 300     | 400     | 500     | 600     | 700     | 800     | 900     | 1 000   |
|-------------------|-----|---------|---------|---------|---------|---------|---------|---------|---------|---------|
| Xylose            |     | 0.02737 | 0.03831 | 0.04876 | 0.05790 | 0.06541 | 0.07151 | 0.07652 | 0.08071 | 0.08427 |
| DXP               |     | 0.03046 | 0.04078 | 0.05065 | 0.05928 | 0.06640 | 0.07222 | 0.07705 | 0.08111 | 0.08458 |
| FF1               |     | 0.02369 | 0.03236 | 0.04109 | 0.04882 | 0.05523 | 0.06046 | 0.06478 | 0.06840 | 0.07146 |
| FF2               |     | 0.02393 | 0.03248 | 0.04113 | 0.04883 | 0.05523 | 0.06047 | 0.06479 | 0.06841 | 0.07147 |
| AXP1              |     | 0.02345 | 0.03295 | 0.04186 | 0.04954 | 0.05581 | 0.06089 | 0.06506 | 0.06854 | 0.07149 |
| AXP2              |     | 0.02340 | 0.03293 | 0.04191 | 0.04961 | 0.05588 | 0.06095 | 0.06511 | 0.06858 | 0.07152 |
| AXP3              |     | 0.02282 | 0.03247 | 0.04153 | 0.04931 | 0.05565 | 0.06077 | 0.06498 | 0.06849 | 0.07146 |
| AXP4              |     | 0.02507 | 0.03464 | 0.04364 | 0.05137 | 0.05768 | 0.06280 | 0.06699 | 0.07050 | 0.07346 |
| AXP5              |     | 0.02297 | 0.03265 | 0.04166 | 0.04940 | 0.05571 | 0.06083 | 0.06502 | 0.06852 | 0.07149 |
| AXP6              |     | 0.02332 | 0.03282 | 0.04177 | 0.04948 | 0.05577 | 0.06087 | 0.06506 | 0.06856 | 0.07152 |
| AXP7              |     | 0.02327 | 0.03281 | 0.04186 | 0.04963 | 0.05593 | 0.06102 | 0.06518 | 0.06865 | 0.07158 |
| H <sub>2</sub> O  |     | 0.00596 | 0.00602 | 0.00617 | 0.00640 | 0.00665 | 0.00691 | 0.00717 | 0.00744 | 0.00771 |
| 2-O-acetyl-xylose |     | 0.03607 | 0.04937 | 0.06243 | 0.07389 | 0.08335 | 0.09107 | 0.09743 | 0.10276 | 0.10728 |
| OADXP             |     | 0.03936 | 0.05217 | 0.06451 | 0.07536 | 0.08440 | 0.09184 | 0.09803 | 0.10324 | 0.10768 |
| FFL1              |     | 0.02357 | 0.03230 | 0.04105 | 0.04879 | 0.05520 | 0.06045 | 0.06477 | 0.06839 | 0.07145 |
| FFL2              |     | 0.02379 | 0.03243 | 0.04116 | 0.04889 | 0.05528 | 0.06051 | 0.06483 | 0.06843 | 0.07149 |
| AXPL1             |     | 0.03217 | 0.04405 | 0.05550 | 0.06547 | 0.07370 | 0.08043 | 0.08598 | 0.09062 | 0.09455 |
| AXPL2             |     | 0.02338 | 0.03292 | 0.04190 | 0.04961 | 0.05588 | 0.06095 | 0.06511 | 0.06858 | 0.07152 |
| AXPL3             |     | 0.02270 | 0.03243 | 0.04160 | 0.04941 | 0.05574 | 0.06084 | 0.06502 | 0.06851 | 0.07147 |
| AXPL4             |     | 0.03437 | 0.04607 | 0.05747 | 0.06745 | 0.07568 | 0.08242 | 0.08797 | 0.09262 | 0.09656 |
| AXPL5             |     | 0.03189 | 0.04380 | 0.05533 | 0.06537 | 0.07363 | 0.08037 | 0.08592 | 0.09057 | 0.09451 |
| AXPL6             |     | 0.03146 | 0.04350 | 0.05514 | 0.06524 | 0.07354 | 0.08030 | 0.08587 | 0.09053 | 0.09448 |
| AXPL7             |     | 0.03058 | 0.04292 | 0.05485 | 0.06512 | 0.07350 | 0.08029 | 0.08587 | 0.09052 | 0.09446 |
| AA                |     | 0.01069 | 0.01426 | 0.01778 | 0.02087 | 0.02347 | 0.02564 | 0.02748 | 0.02905 | 0.03040 |
| 4OMGLA            |     | 0.03863 | 0.05270 | 0.06623 | 0.07809 | 0.08787 | 0.09584 | 0.10240 | 0.10788 | 0.11251 |
| DGLA              |     | 0.04008 | 0.05425 | 0.06754 | 0.07908 | 0.08860 | 0.09638 | 0.10281 | 0.10821 | 0.11278 |
| FFL1              |     | 0.03425 | 0.04640 | 0.05834 | 0.06886 | 0.07758 | 0.08472 | 0.09060 | 0.09552 | 0.09966 |
| FFL2              |     | 0.03450 | 0.04650 | 0.05838 | 0.06888 | 0.07759 | 0.08473 | 0.09062 | 0.09553 | 0.09968 |
| AXPL1             |     | 0.03431 | 0.04717 | 0.05925 | 0.06969 | 0.07825 | 0.08521 | 0.09093 | 0.09570 | 0.09972 |
| AXPL2             |     | 0.03447 | 0.04732 | 0.05942 | 0.06986 | 0.07841 | 0.08534 | 0.09104 | 0.09579 | 0.09981 |
| AXPL3             |     | 0.03357 | 0.04656 | 0.05882 | 0.06938 | 0.07802 | 0.08504 | 0.09081 | 0.09561 | 0.09966 |
| AXPL4             |     | 0.03662 | 0.04928 | 0.06130 | 0.07172 | 0.08028 | 0.08724 | 0.09297 | 0.09774 | 0.10177 |
| AXPL5             |     | 0.03381 | 0.04683 | 0.05903 | 0.06954 | 0.07815 | 0.08514 | 0.09088 | 0.09566 | 0.09970 |
| AXPL6             |     | 0.03035 | 0.04241 | 0.05326 | 0.06233 | 0.06960 | 0.07542 | 0.08013 | 0.08403 | 0.08730 |
| AXPL7             |     | 0.03109 | 0.04292 | 0.05360 | 0.06258 | 0.06978 | 0.07555 | 0.08023 | 0.08410 | 0.08735 |
| Methanol          |     | 0.00747 | 0.00880 | 0.01071 | 0.01271 | 0.01455 | 0.01616 | 0.01757 | 0.01882 | 0.01992 |

**Table S2.** Entropy,  $S$ , in kcal mol<sup>-1</sup> K<sup>-1</sup> at different temperatures of chemical species involved in the initial elementary reactions: ring-opening, ring-contraction, and elimination.

| Species           | T/K | 200     | 300                  | 400                  | 500                  | 600                  | 700                  | 800                  | 900                  | 1 000                |
|-------------------|-----|---------|----------------------|----------------------|----------------------|----------------------|----------------------|----------------------|----------------------|----------------------|
| Xylose            |     | 0.08125 | 0.09491              | 0.10771              | 0.11985              | 0.13130              | 0.14202              | 0.15205              | 0.16144              | 0.17025              |
| DXP               |     | 0.08790 | 0.10207              | 0.11505              | 0.12720              | 0.13856              | 0.14917              | 0.15907              | 0.16833              | 0.17700              |
| FF1               |     | 0.08027 | 0.09160              | 0.10218              | 0.11224              | 0.12176              | 0.13070              | 0.13909              | 0.14695              | 0.15434              |
| FF2               |     | 0.08114 | 0.09246              | 0.10300              | 0.11302              | 0.12250              | 0.13142              | 0.13978              | 0.14762              | 0.15498              |
| AXP1              |     | 0.07714 | 0.08904              | 0.10015              | 0.11065              | 0.12050              | 0.12970              | 0.13829              | 0.14632              | 0.15384              |
| AXP2              |     | 0.07756 | 0.08944              | 0.10057              | 0.11108              | 0.12095              | 0.13017              | 0.13877              | 0.14680              | 0.15432              |
| AXP3              |     | 0.07713 | 0.08869              | 0.09963              | 0.11001              | 0.11978              | 0.12893              | 0.13748              | 0.14547              | 0.15296              |
| AXP4              |     | 0.02507 | 0.03464              | 0.04364              | 0.05137              | 0.05768              | 0.06280              | 0.06699              | 0.07050              | 0.07346              |
| AXP5              |     | 0.07682 | 0.08857              | 0.09962              | 0.11008              | 0.11992              | 0.12912              | 0.13770              | 0.14573              | 0.15325              |
| AXP6              |     | 0.07719 | 0.08897              | 0.10001              | 0.11045              | 0.12027              | 0.12944              | 0.13801              | 0.14602              | 0.15353              |
| AXP7              |     | 0.07780 | 0.08950              | 0.10052              | 0.11096              | 0.12078              | 0.12996              | 0.13852              | 0.14653              | 0.15403              |
| H <sub>2</sub> O  |     | 0.04189 | 0.04512<br>(0.04516) | 0.04744<br>(0.04749) | 0.04929<br>(0.04935) | 0.05084<br>(0.05090) | 0.05219<br>(0.05226) | 0.05339<br>(0.05348) | 0.05449<br>(0.05458) | 0.05549<br>(0.05561) |
| 2-O-acetyl-xylose |     | 0.09548 | 0.11204              | 0.12762              | 0.14247              | 0.15652              | 0.16972              | 0.18210              | 0.19371              | 0.20460              |
| OADXP             |     | 0.09922 | 0.11685              | 0.13300              | 0.14814              | 0.16232              | 0.17559              | 0.18799              | 0.19959              | 0.21048              |
| FFL1              |     | 0.08007 | 0.09136              | 0.10193              | 0.11199              | 0.12150              | 0.13045              | 0.13883              | 0.14670              | 0.15409              |
| FFL2              |     | 0.08090 | 0.09224              | 0.10282              | 0.11289              | 0.12241              | 0.13135              | 0.13974              | 0.14760              | 0.15498              |
| AXPL1             |     | 0.09098 | 0.10579              | 0.11969              | 0.13288              | 0.14533              | 0.15701              | 0.16794              | 0.17818              | 0.18780              |
| AXPL2             |     | 0.07758 | 0.08946              | 0.10058              | 0.11109              | 0.12096              | 0.13017              | 0.13877              | 0.14681              | 0.15433              |
| AXPL3             |     | 0.07809 | 0.08945              | 0.10027              | 0.11058              | 0.12030              | 0.12939              | 0.13789              | 0.14584              | 0.15329              |
| AXPL4             |     | 0.03437 | 0.04607              | 0.05747              | 0.06745              | 0.07568              | 0.08242              | 0.08797              | 0.09262              | 0.09656              |
| AXPL5             |     | 0.09121 | 0.10588              | 0.11970              | 0.13285              | 0.14527              | 0.15692              | 0.16784              | 0.17807              | 0.18767              |
| AXPL6             |     | 0.09053 | 0.10508              | 0.11885              | 0.13199              | 0.14440              | 0.15606              | 0.16698              | 0.17722              | 0.18683              |
| AXPL7             |     | 0.08916 | 0.10359              | 0.11736              | 0.13055              | 0.14303              | 0.15475              | 0.16573              | 0.17602              | 0.18567              |
| AA                |     | 0.06251 | 0.06805<br>(0.06762) | 0.07302<br>(0.07272) | 0.07762<br>(0.07741) | 0.08190<br>(0.08176) | 0.08589<br>(0.08581) | 0.08961<br>(0.08958) | 0.09309<br>(0.09309) | 0.09636<br>(0.09639) |
| 4OMGLA            |     | 0.09739 | 0.11519              | 0.13182              | 0.14759              | 0.16245              | 0.17638              | 0.18942              | 0.20163              | 0.21308              |
| DGLA              |     | 0.09994 | 0.11812              | 0.13501              | 0.15090              | 0.16581              | 0.17975              | 0.19277              | 0.20495              | 0.21638              |
| FFL1              |     | 0.09527 | 0.11065              | 0.12507              | 0.13880              | 0.15177              | 0.16396              | 0.17539              | 0.18610              | 0.19617              |
| FFL2              |     | 0.09565 | 0.11107              | 0.12548              | 0.13918              | 0.15214              | 0.16431              | 0.17573              | 0.18643              | 0.19649              |
| AXPL1             |     | 0.09265 | 0.10863              | 0.12358              | 0.13772              | 0.15101              | 0.16344              | 0.17505              | 0.18591              | 0.19609              |
| AXPL2             |     | 0.09305 | 0.10917              | 0.12422              | 0.13844              | 0.15180              | 0.16428              | 0.17594              | 0.18683              | 0.19704              |
| AXPL3             |     | 0.09289 | 0.10853              | 0.12331              | 0.13734              | 0.15056              | 0.16295              | 0.17453              | 0.18536              | 0.19552              |
| AXPL4             |     | 0.03662 | 0.04928              | 0.06130              | 0.07172              | 0.08028              | 0.08724              | 0.09297              | 0.09774              | 0.10177              |
| AXPL5             |     | 0.09217 | 0.10806              | 0.12299              | 0.13713              | 0.15044              | 0.16289              | 0.17452              | 0.18540              | 0.19560              |
| AXPL6             |     | 0.08763 | 0.10211              | 0.11572              | 0.12852              | 0.14048              | 0.15159              | 0.16192              | 0.17153              | 0.18051              |
| AXPL7             |     | 0.08862 | 0.10337              | 0.11710              | 0.12997              | 0.14196              | 0.15310              | 0.16344              | 0.17307              | 0.18205              |
| Methanol          |     | 0.05294 | 0.05700<br>(0.05736) | 0.06036<br>(0.06062) | 0.06340<br>(0.06358) | 0.06625<br>(0.06633) | 0.06892<br>(0.06892) | 0.07143<br>(0.07137) | 0.07381<br>(0.07369) | 0.07606<br>(0.07588) |

The experiment-derived values of water, acetic acid, and methanol are provided in round brackets. See Stull et al.<sup>42</sup>

**Table S3.**  $\mathcal{F}_1$  diagnostic.

| <b>Species</b>               | $\mathcal{F}_1$ |
|------------------------------|-----------------|
| Xylose                       | 0.011           |
| DXP                          | 0.012           |
| TS-DXP                       | 0.012           |
| FF1                          | 0.012           |
| TS-FF1                       | 0.016           |
| FF2                          | 0.013           |
| TS-FF2                       | 0.016           |
| AXP1                         | 0.012           |
| TS-AXP1                      | 0.016           |
| AXP2                         | 0.012           |
| TS-AXP2                      | 0.015           |
| 2-O-acetyl-xylose            | 0.013           |
| OADXP                        | 0.014           |
| TS-OADXP                     | 0.014           |
| AXPL1                        | 0.013           |
| TS-AXPL1                     | 0.015           |
| AXPL2                        | 0.014           |
| TS-AXPL2                     | 0.015           |
| 4-O-methyl-D-glucuronic acid | 0.013           |
| DGLA                         | 0.014           |
| TS-DGLA                      | 0.015           |
| FFL1                         | 0.014           |
| TS-FFL1                      | 0.014           |
| AXPL1                        | 0.014           |
| TS-AXPL1                     | 0.014           |
| AXPL2                        | 0.013           |
| TS-AXPL2                     | 0.015           |
